# Supplementary figures and images for: Structure–transfection activity relationships in a series of novel cationic lipids with heterocyclic head-groups
Source: Royal Society of Chemistry journal article supplement (doi:10.1039/c3ob40442k), 2013-01-01

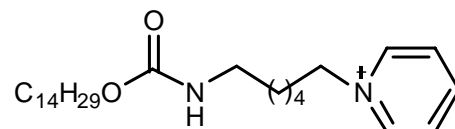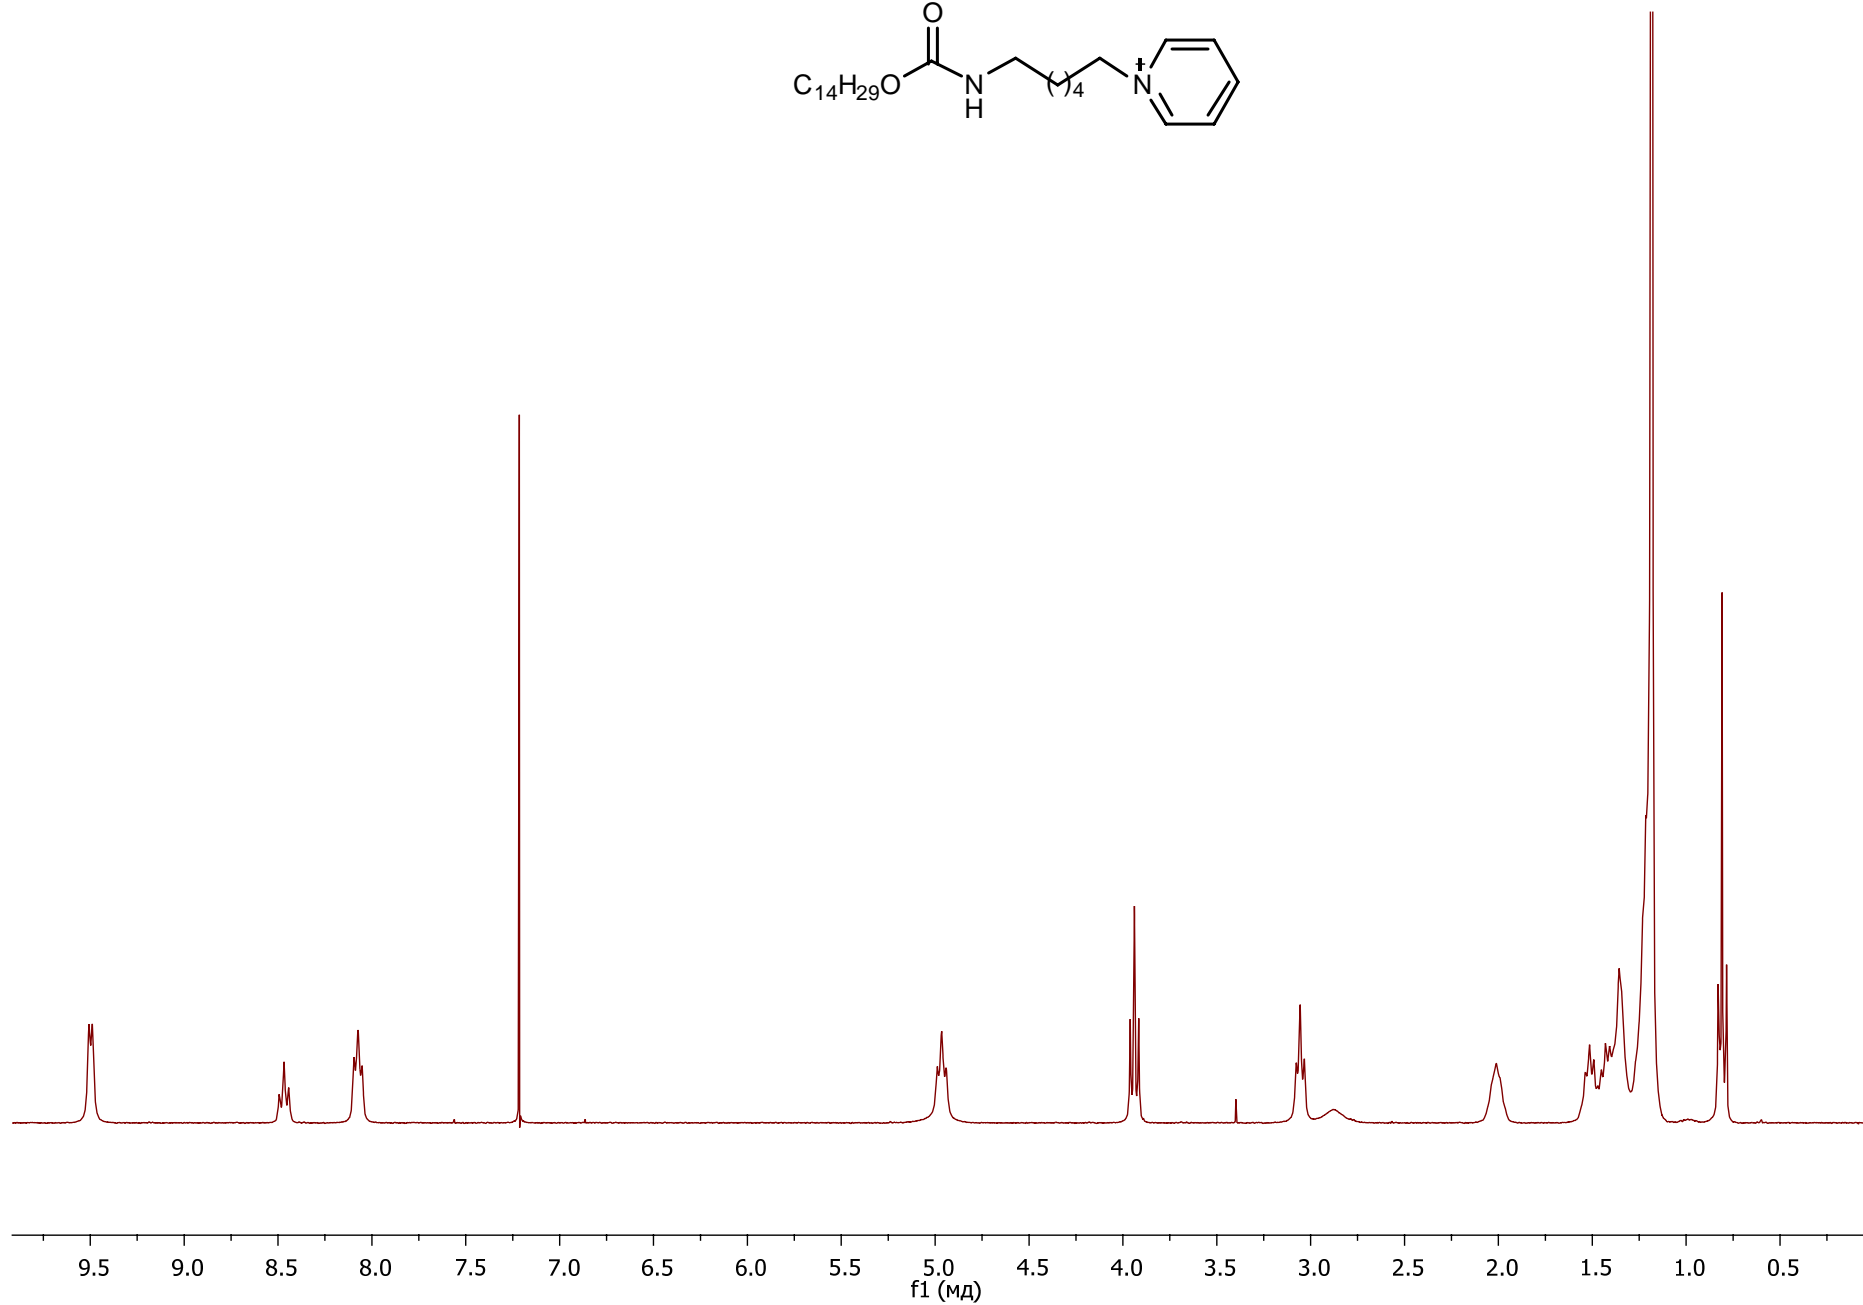

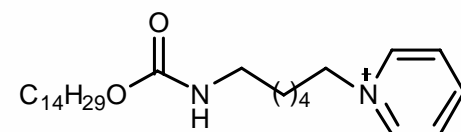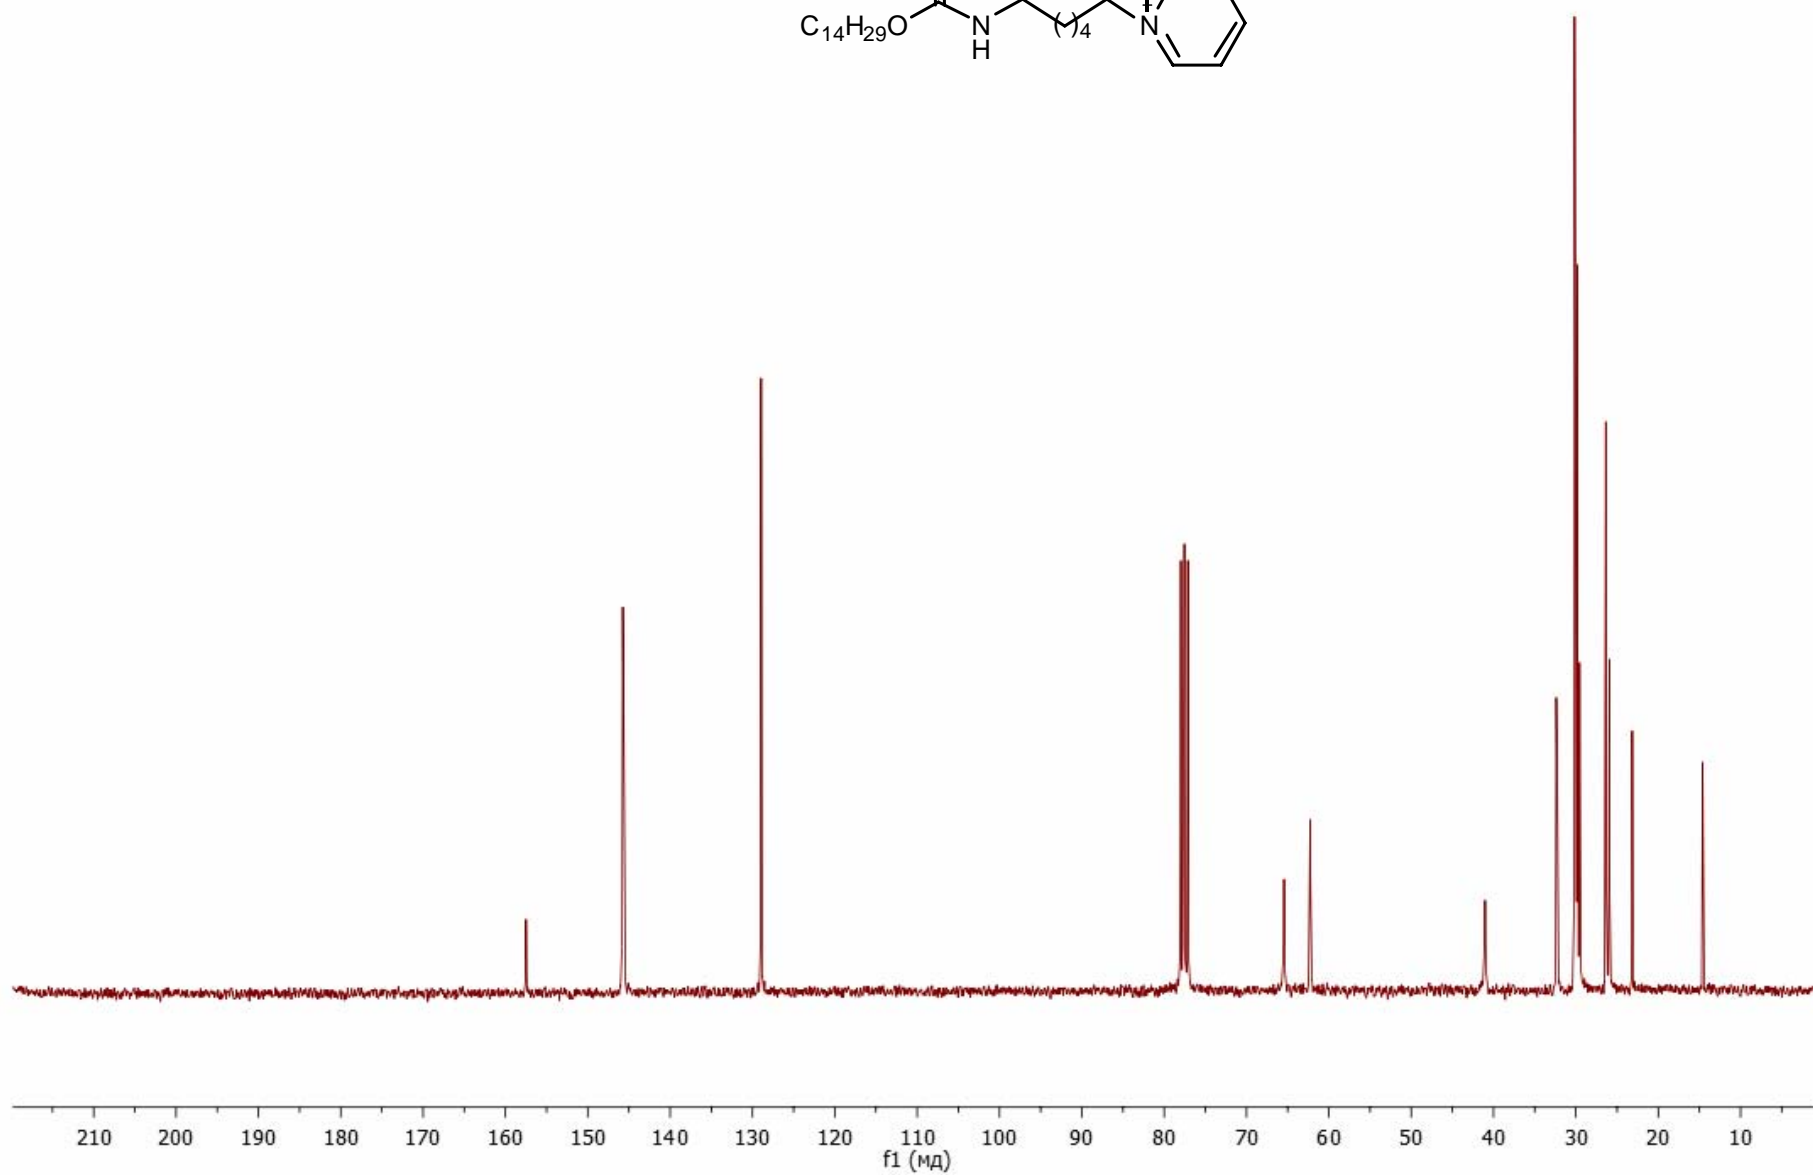

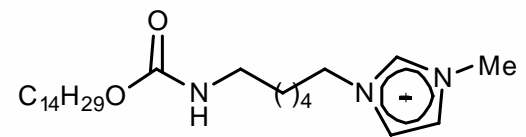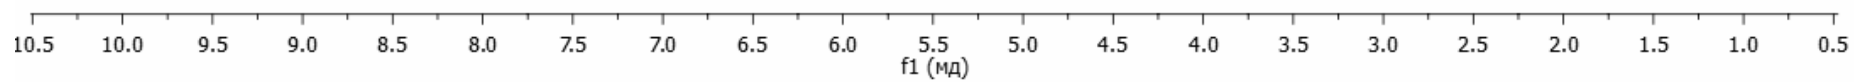

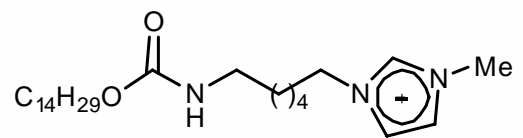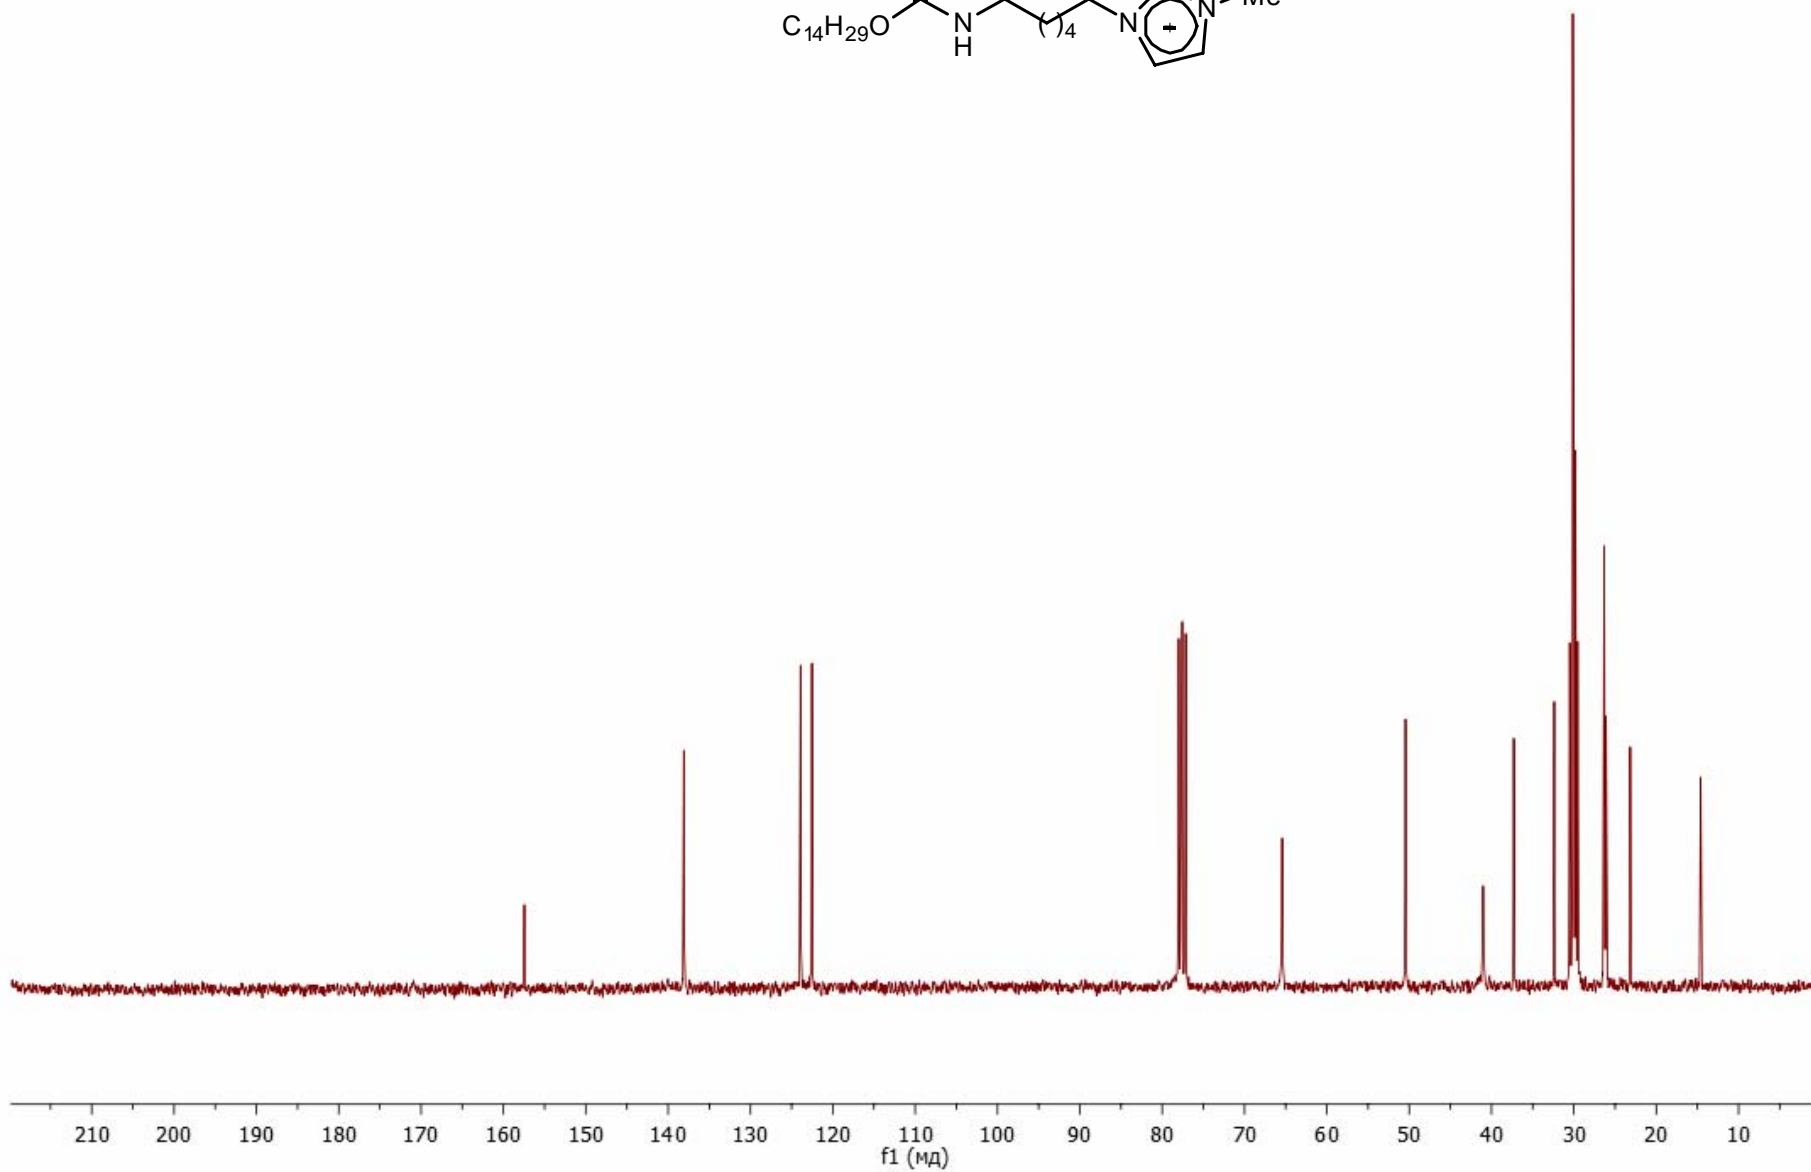

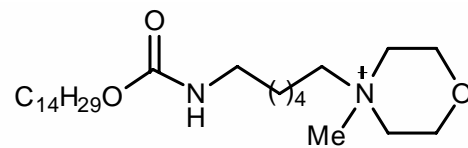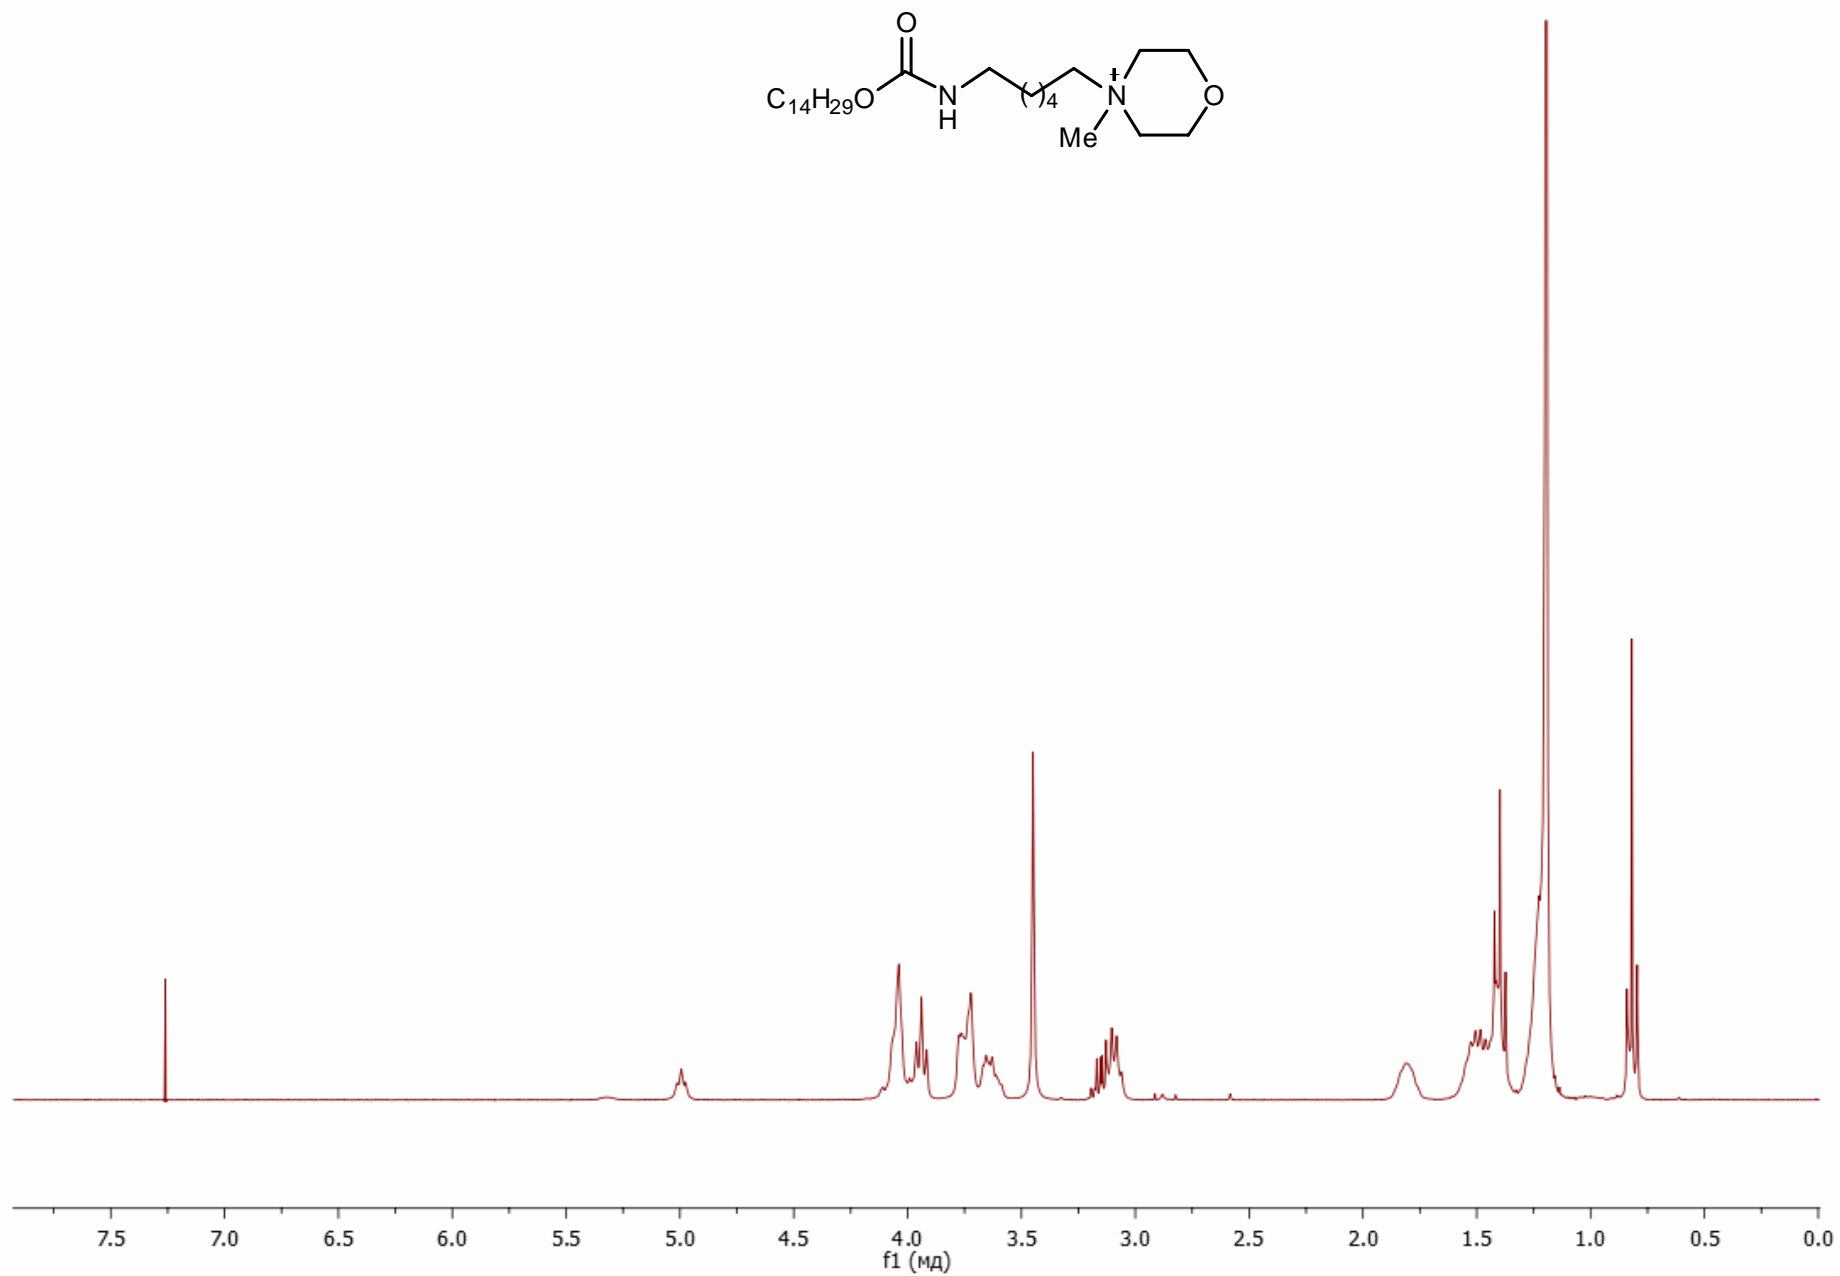

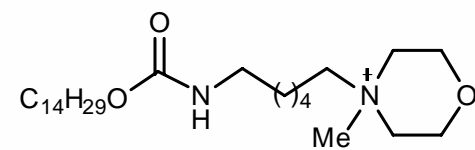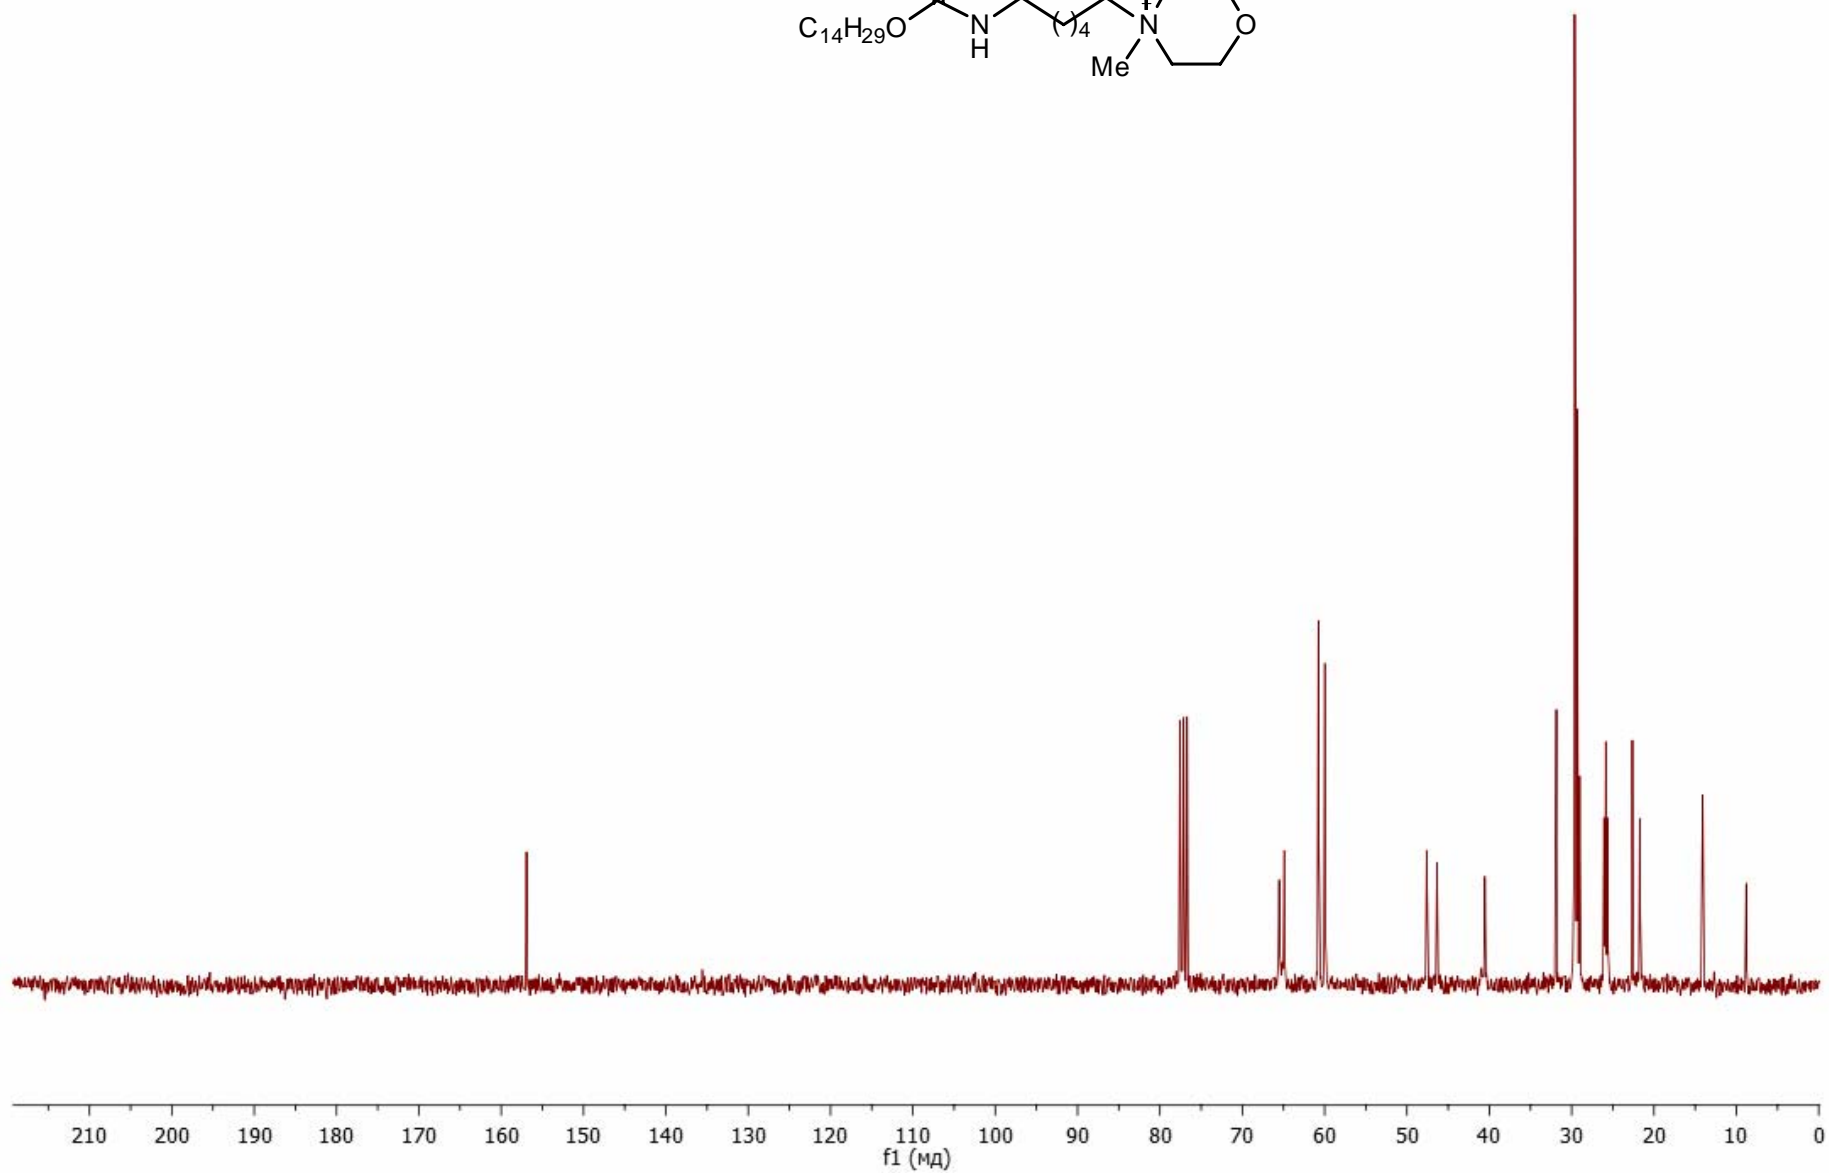

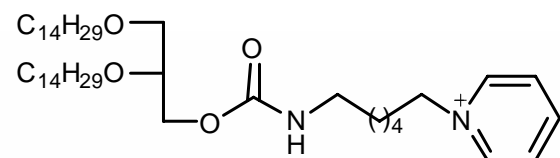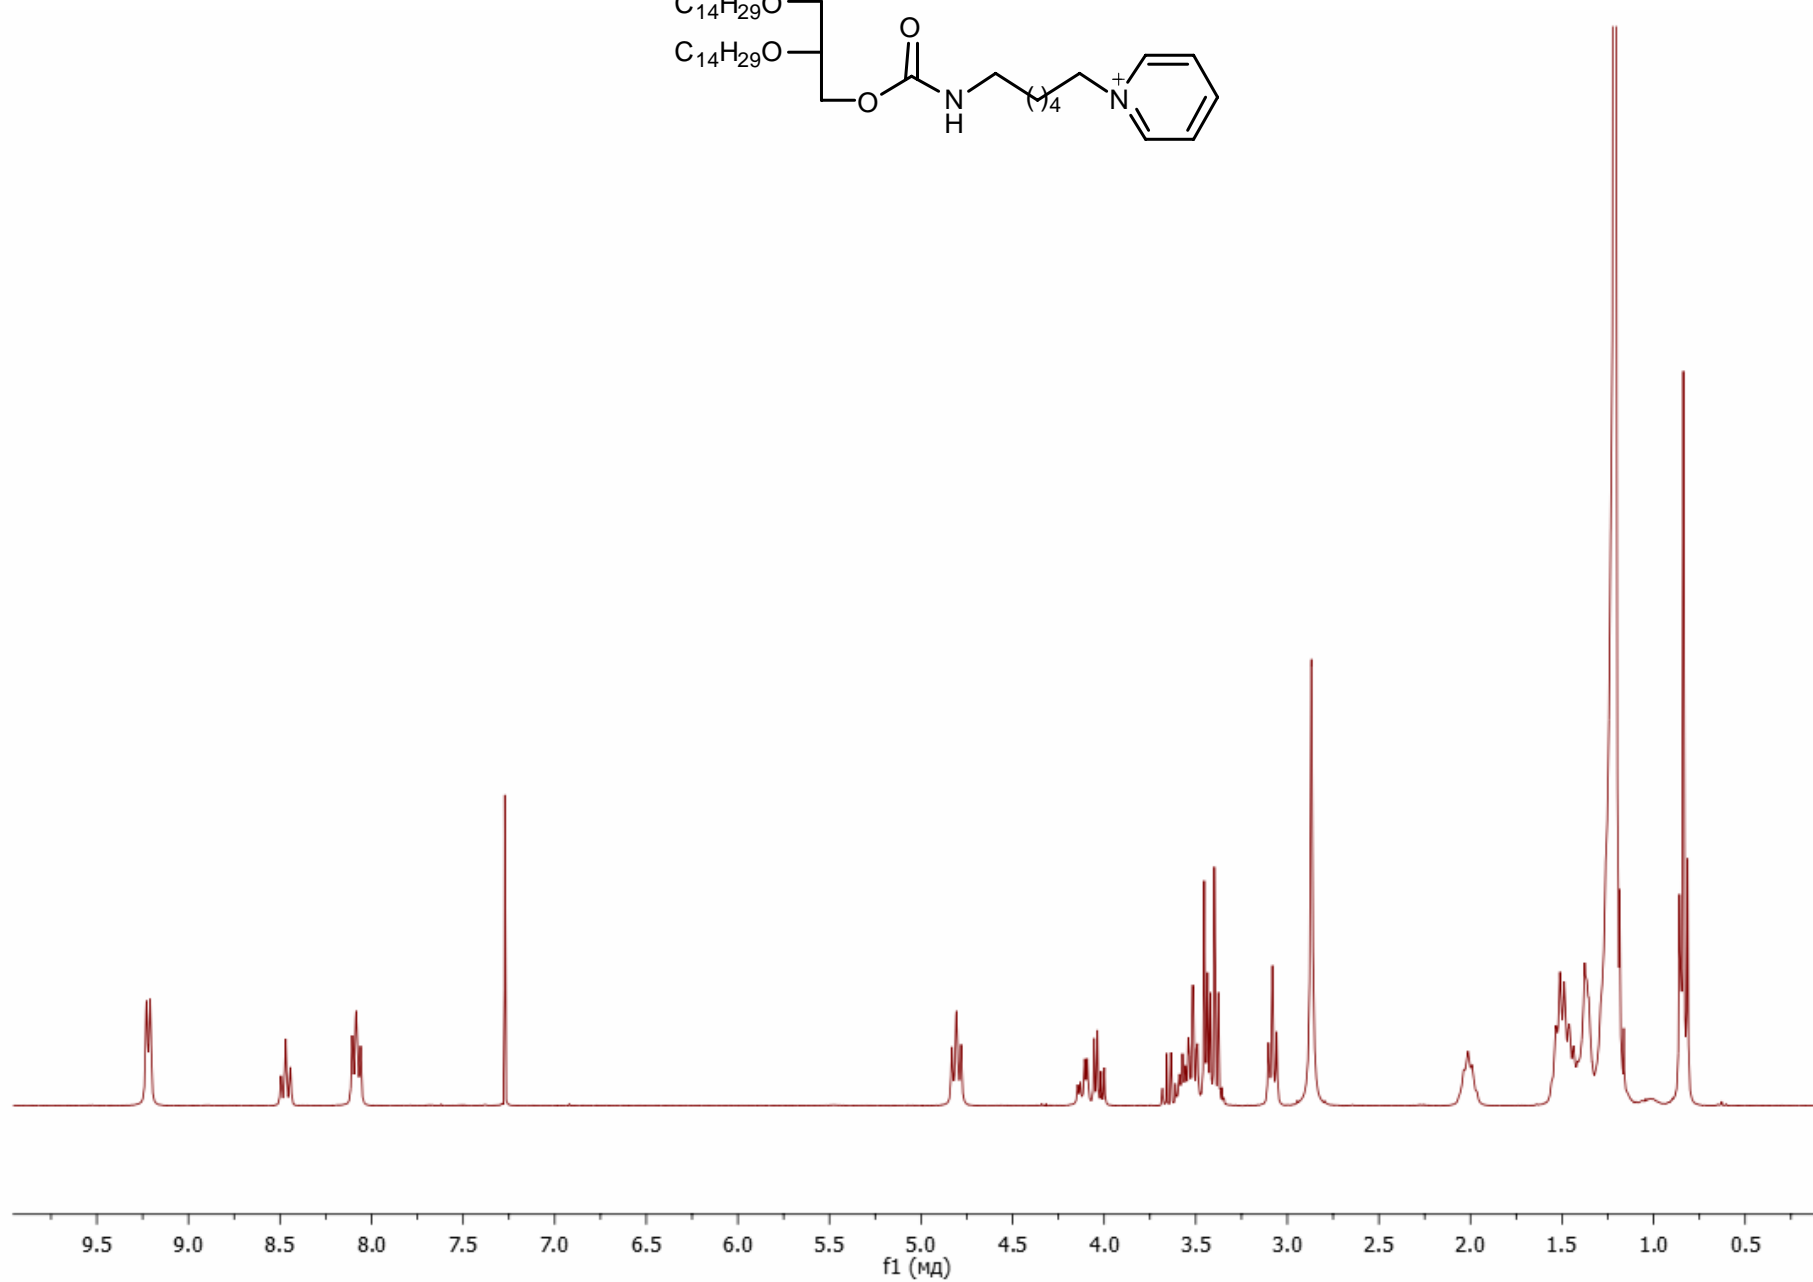

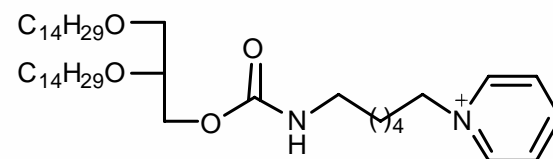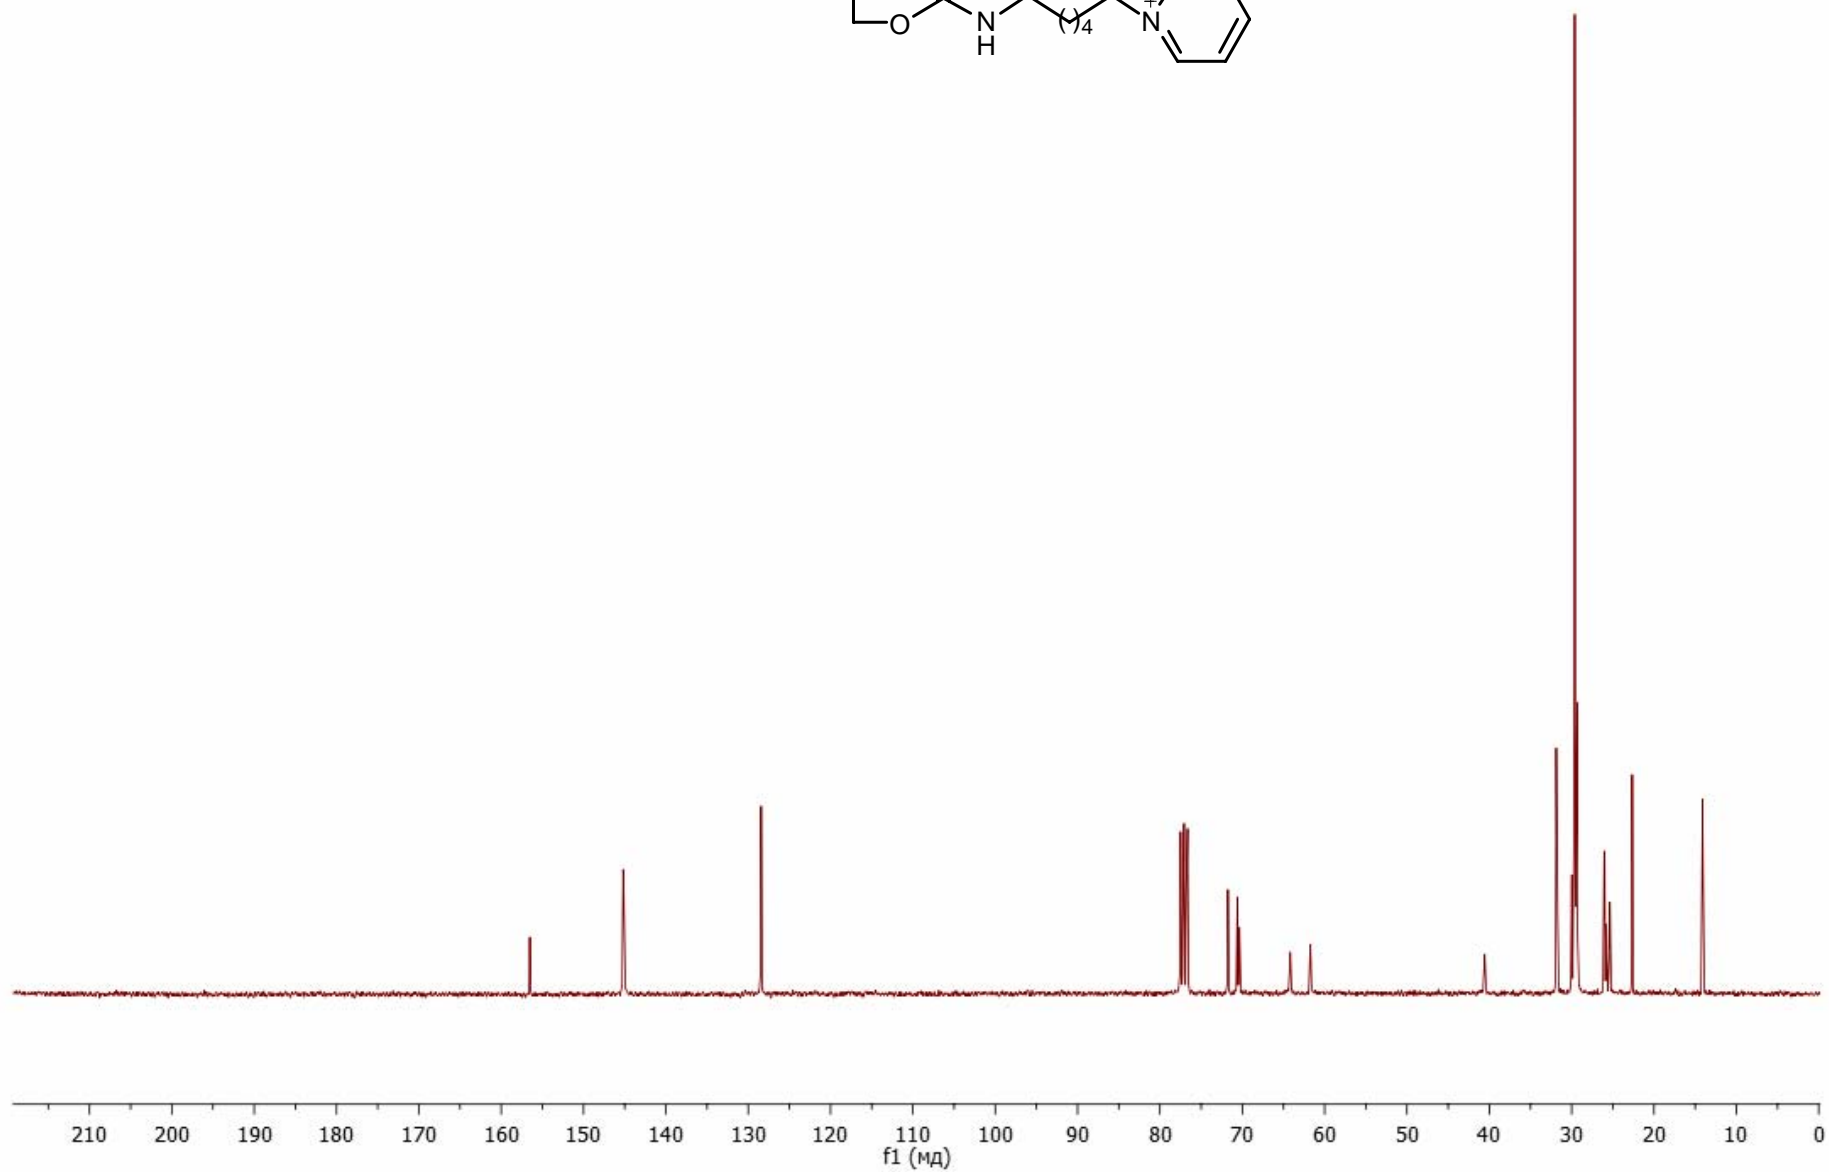



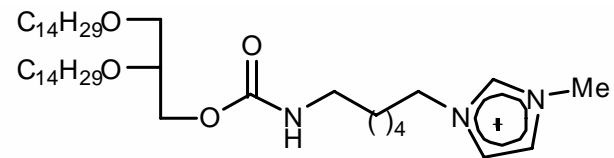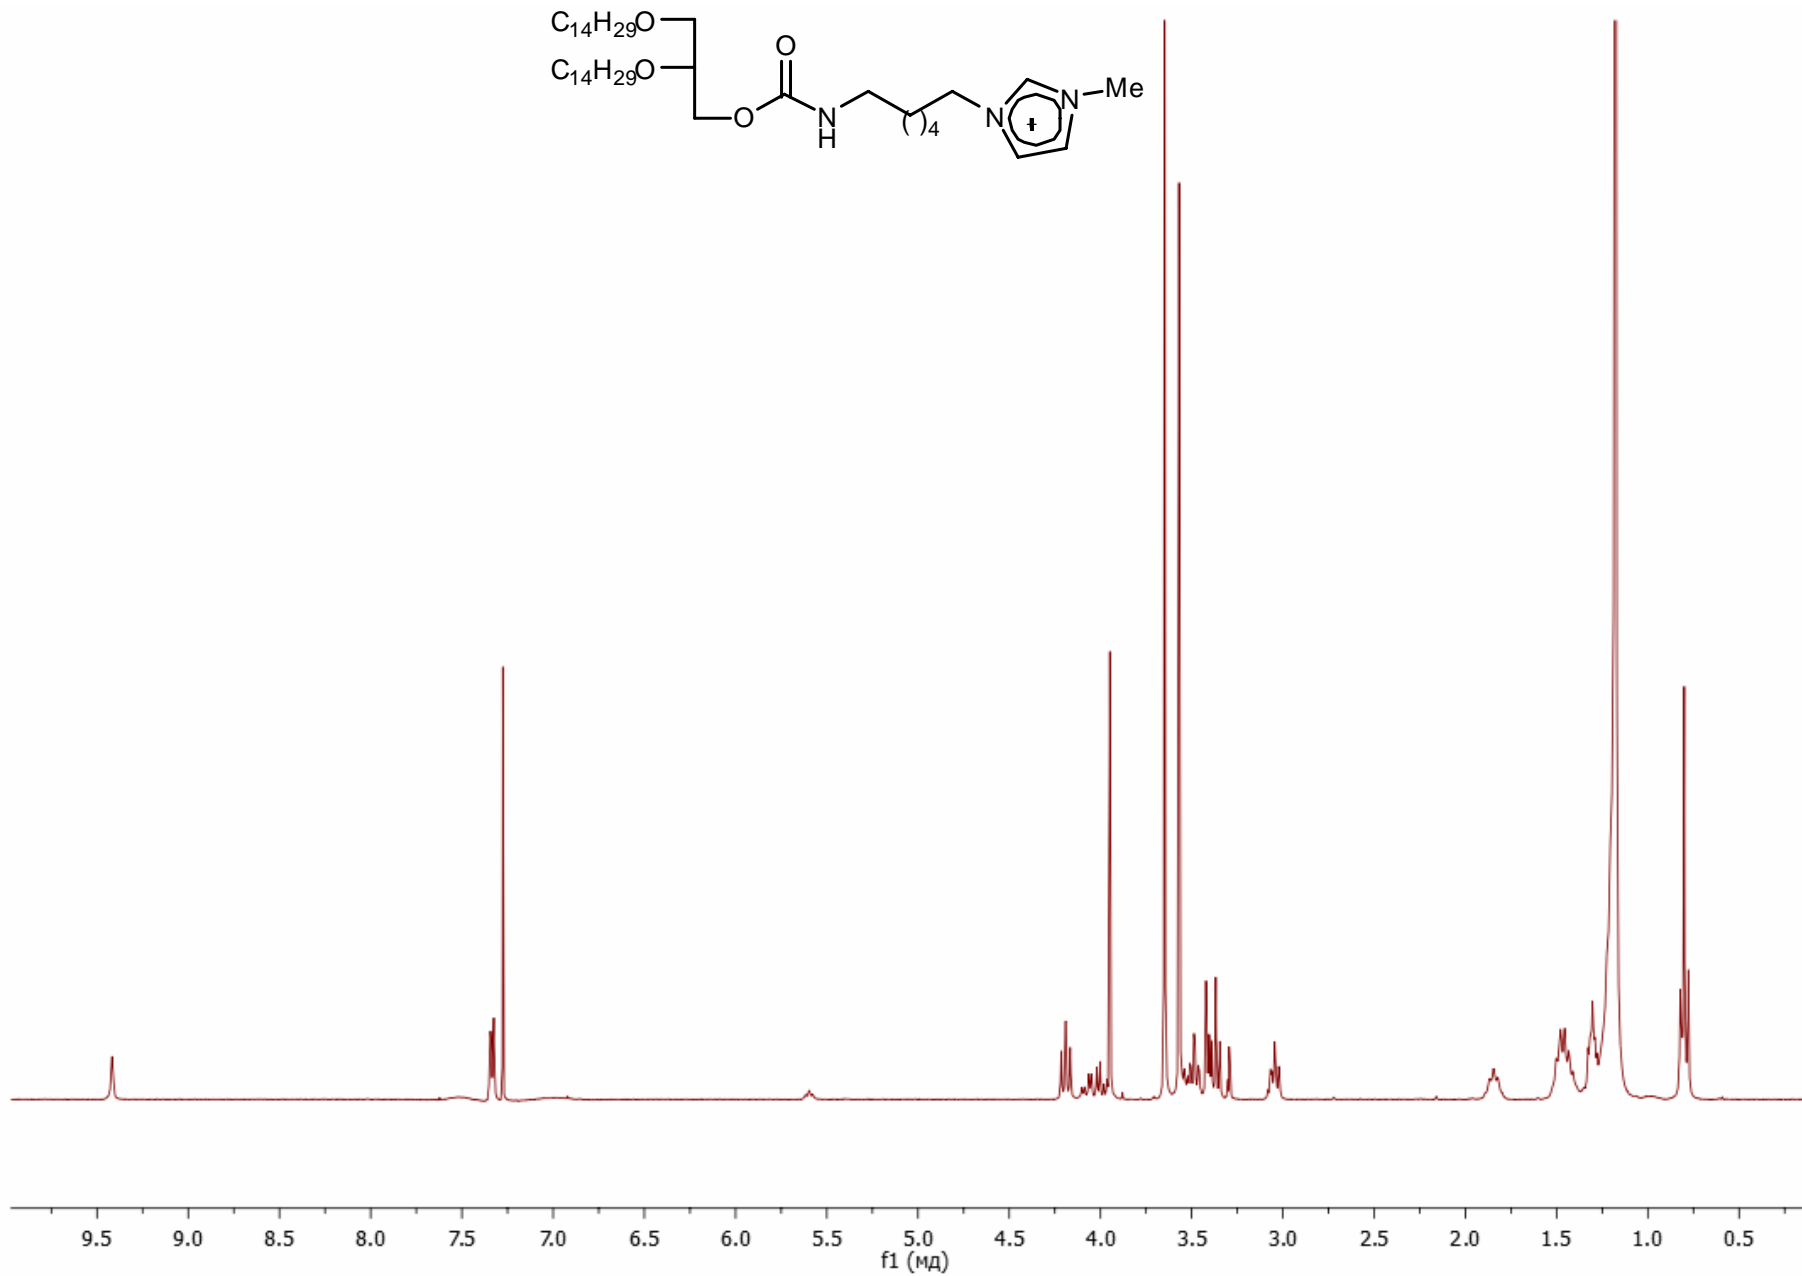

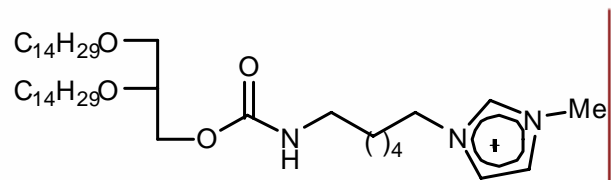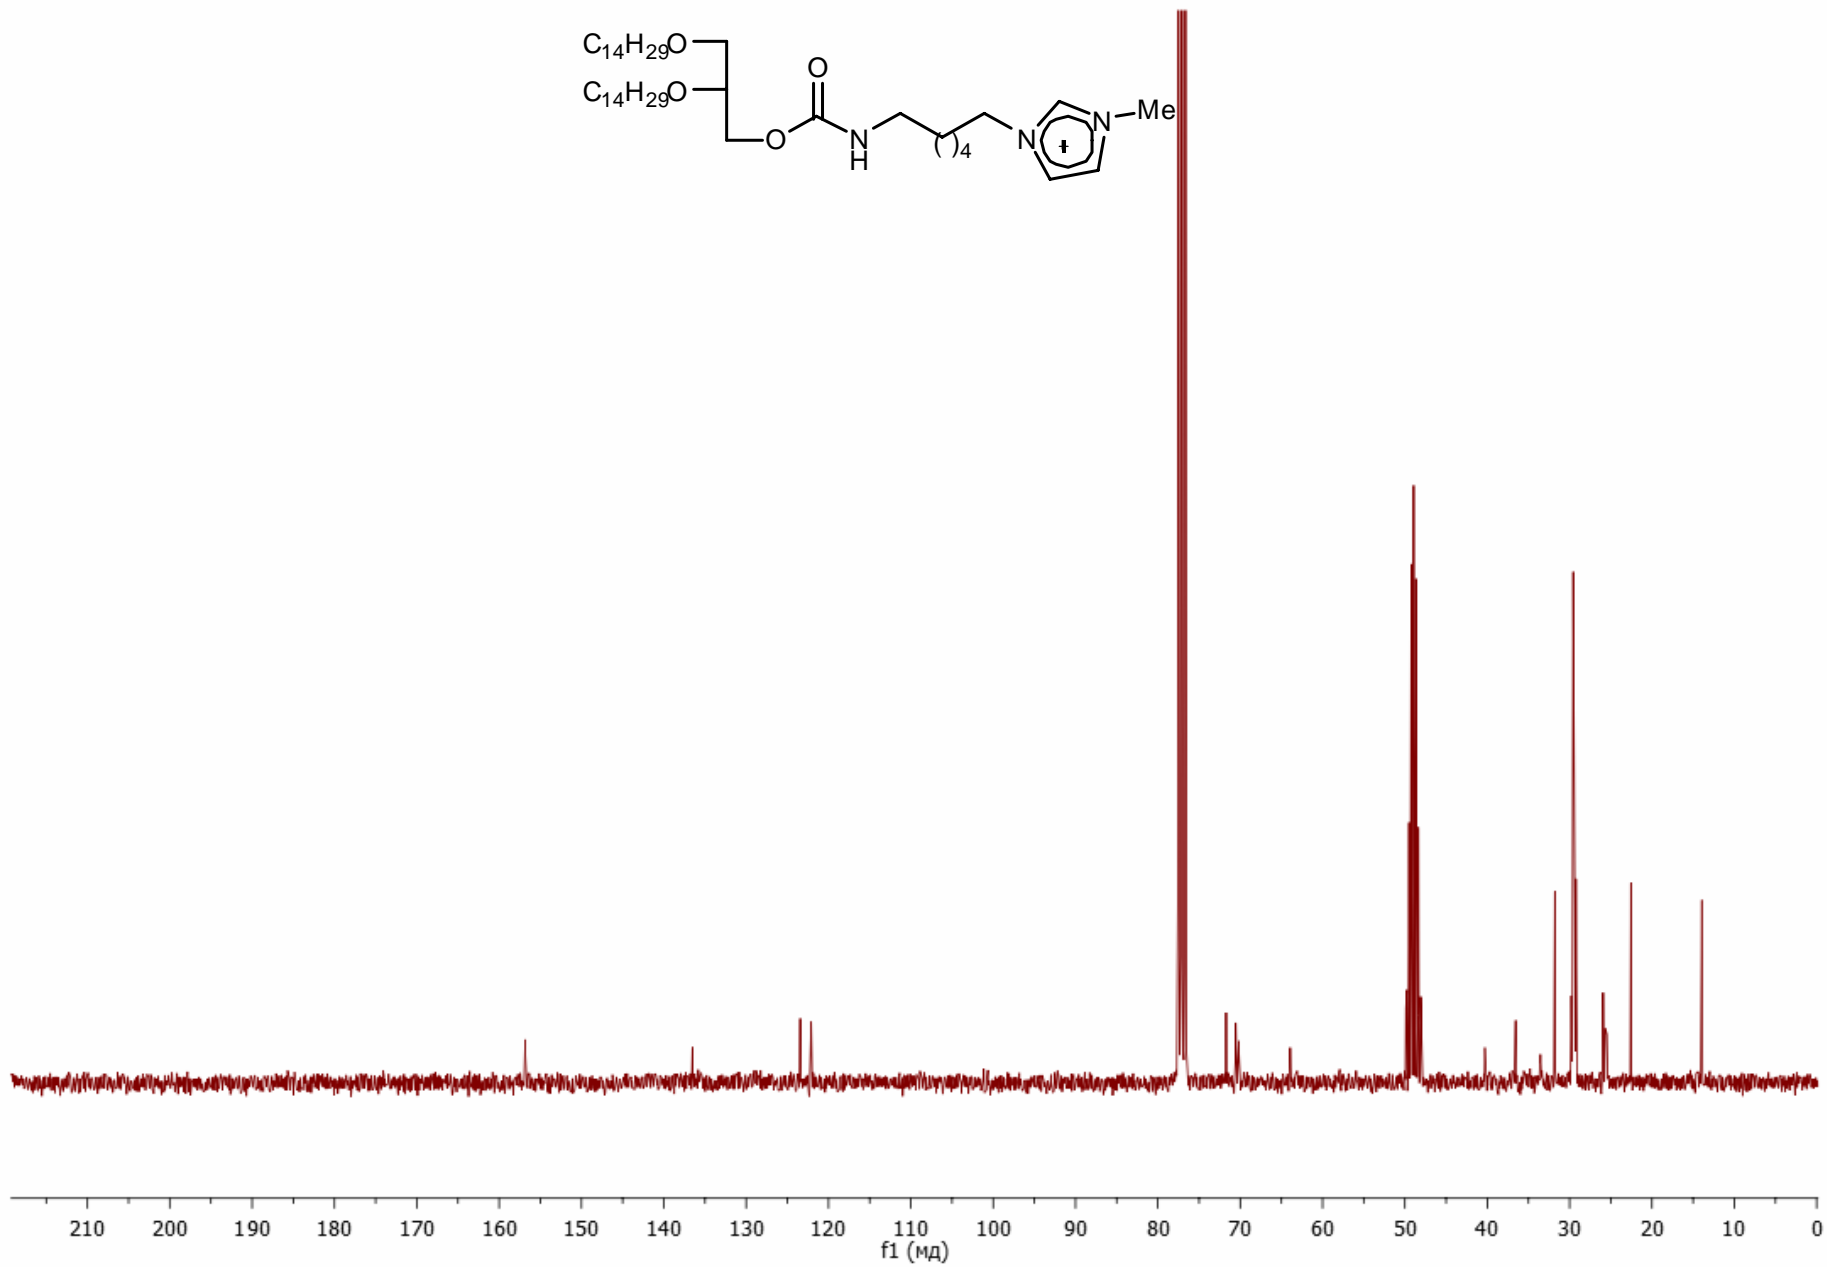

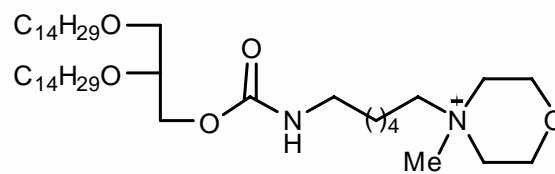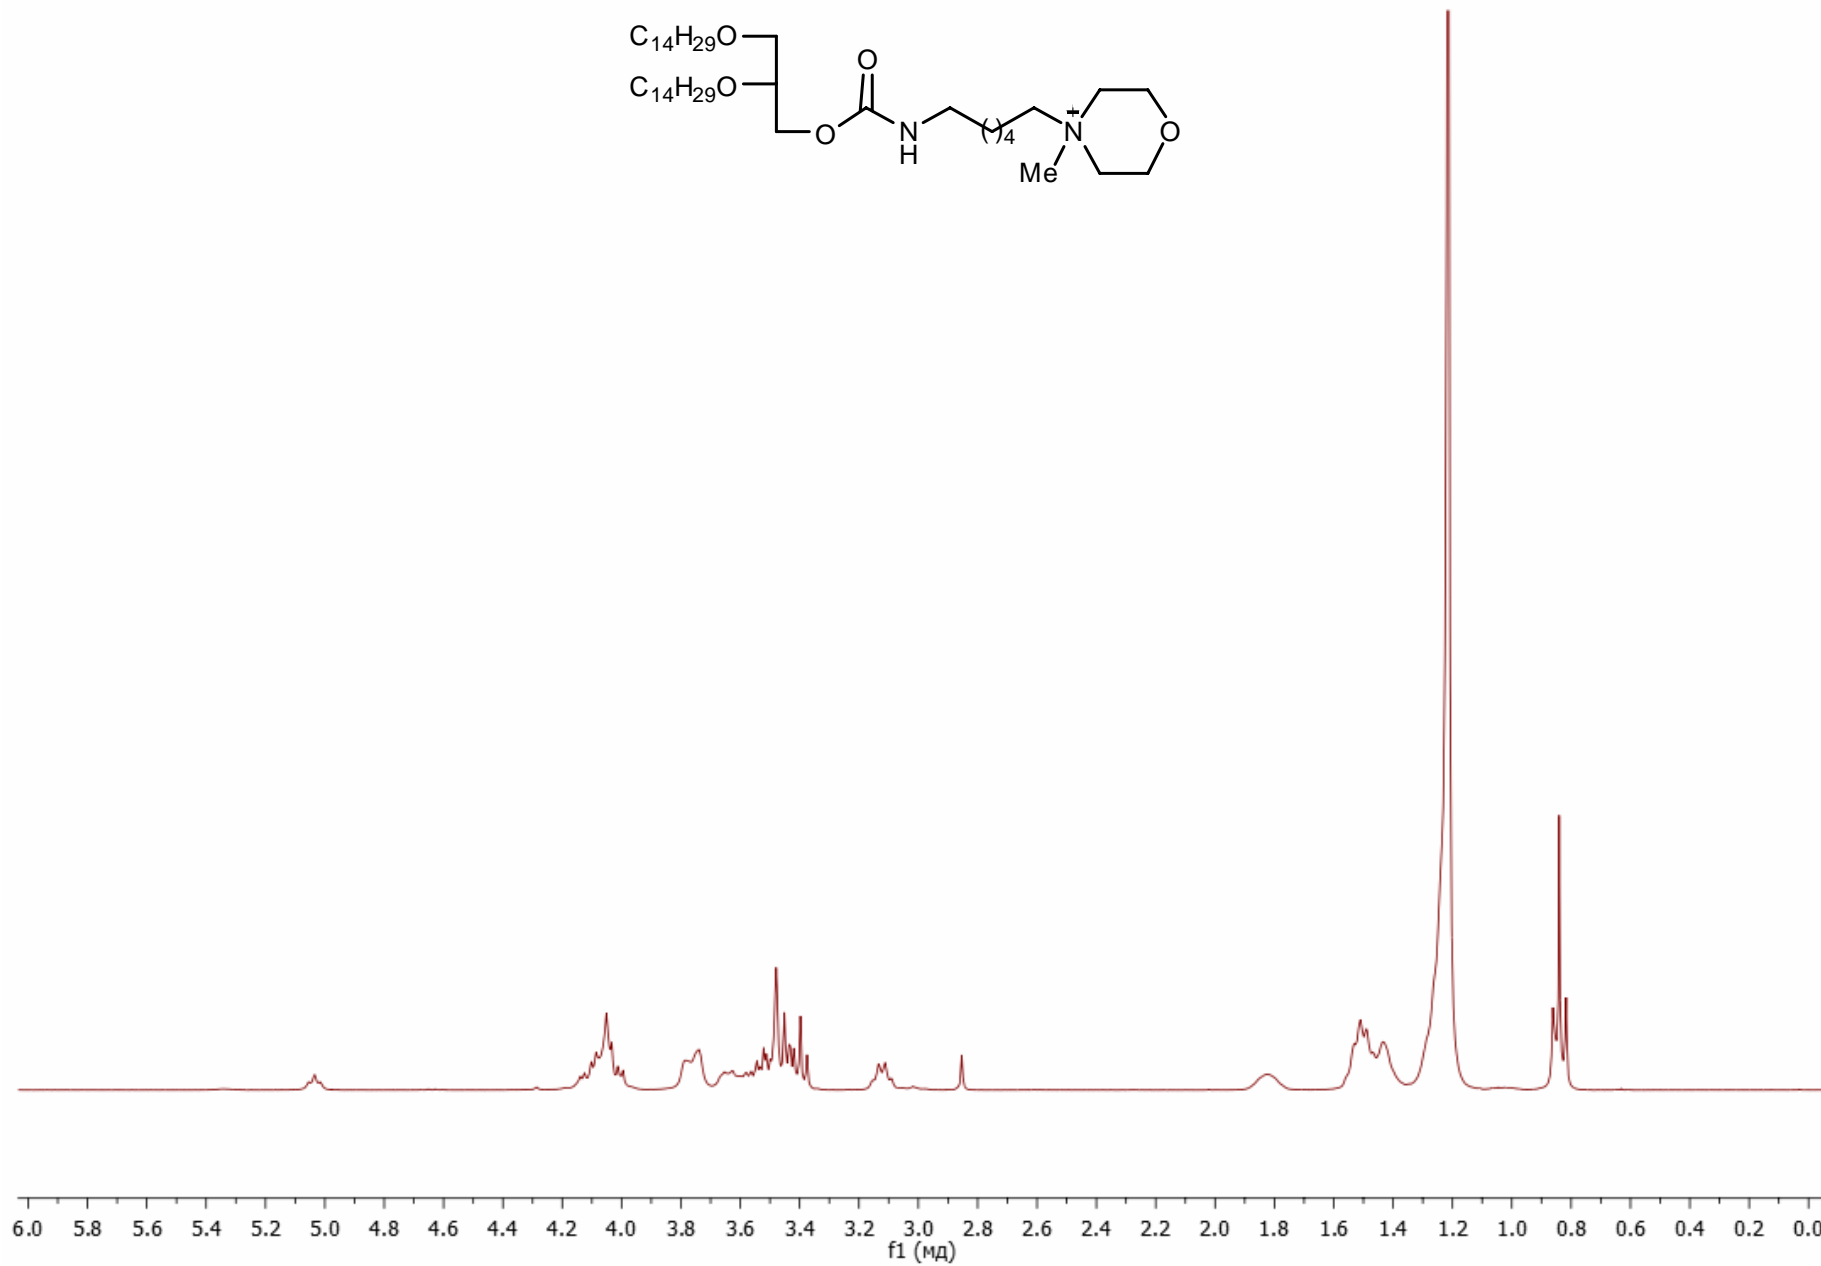

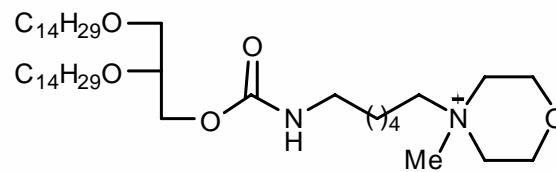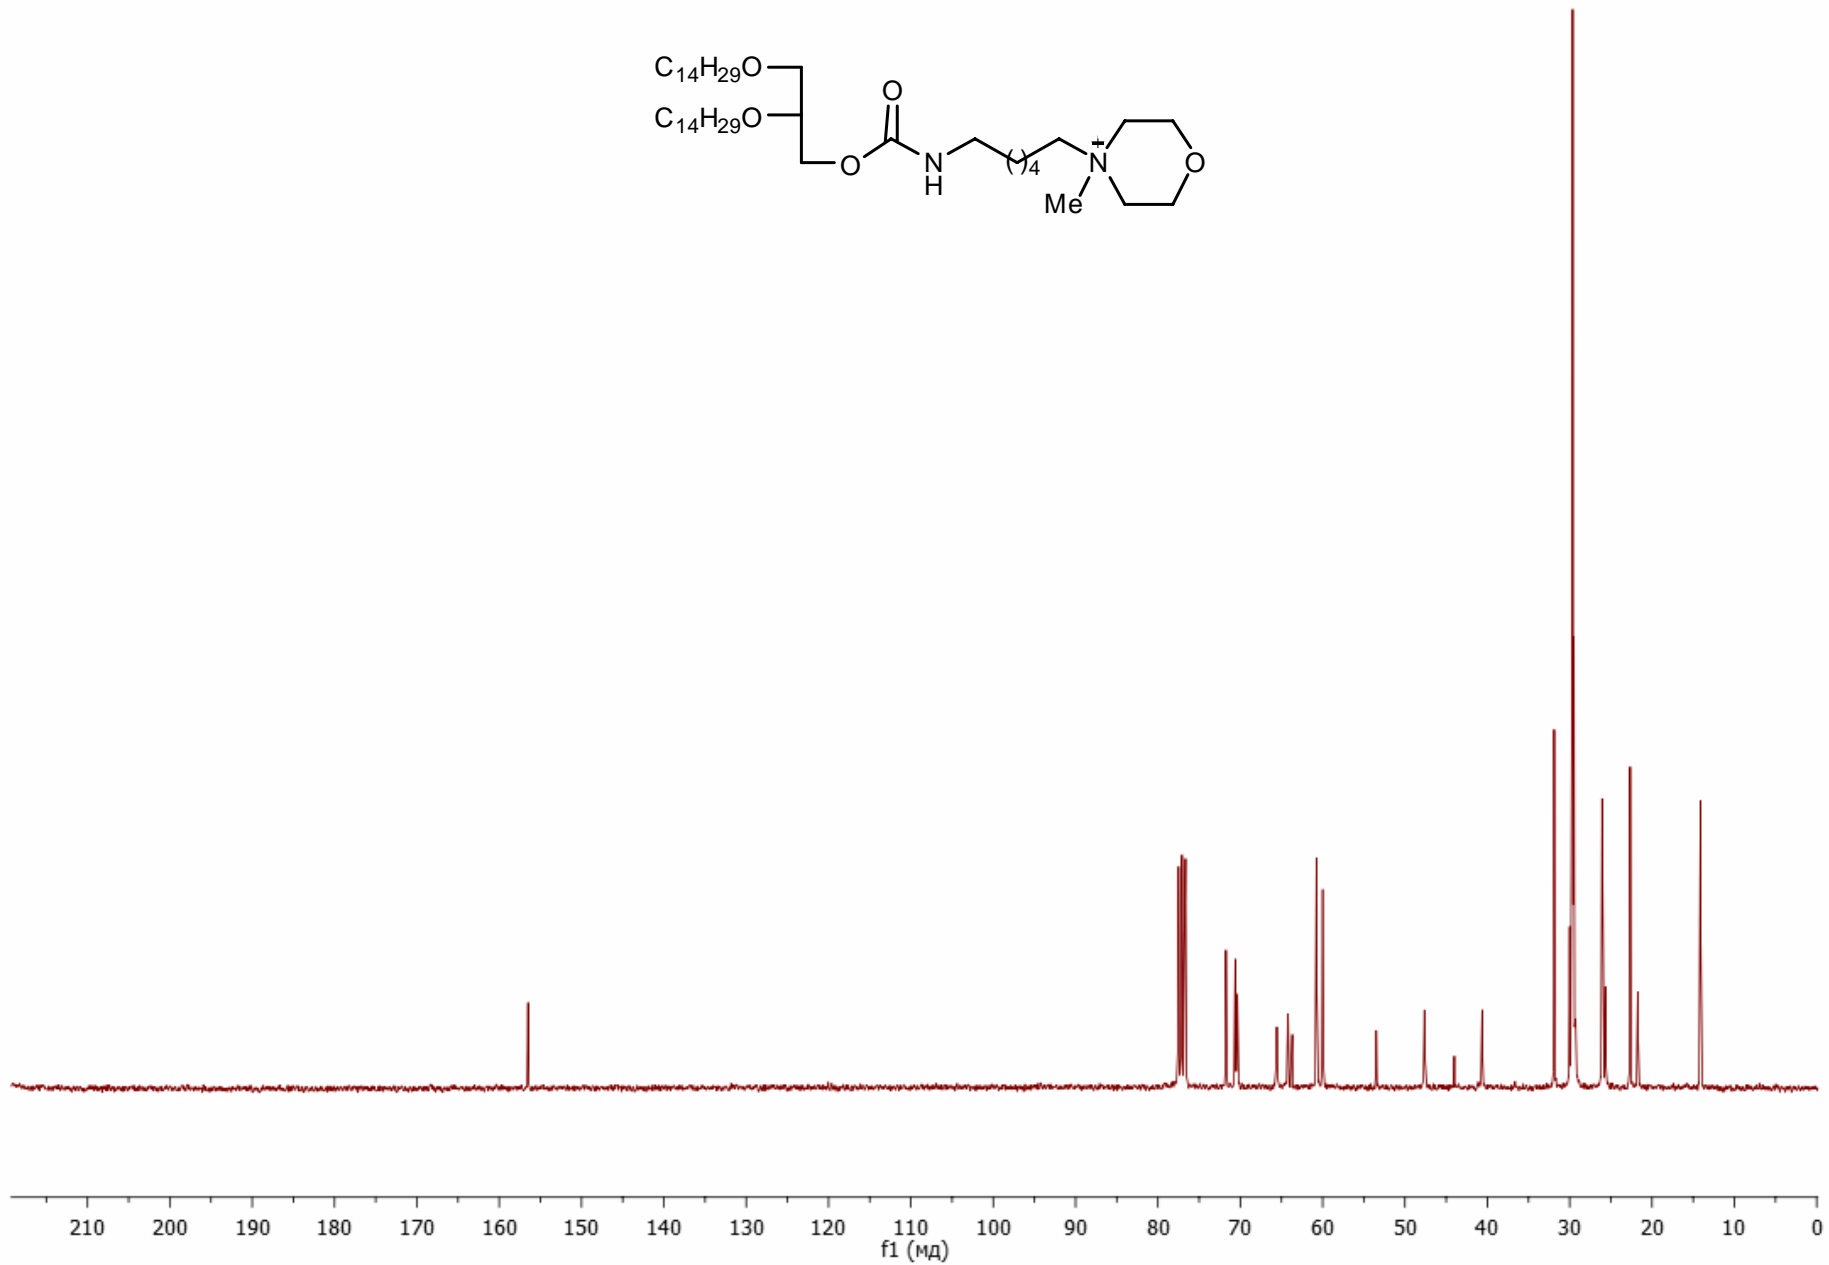





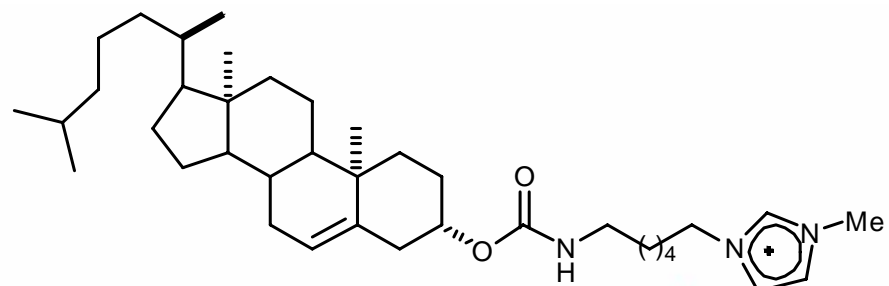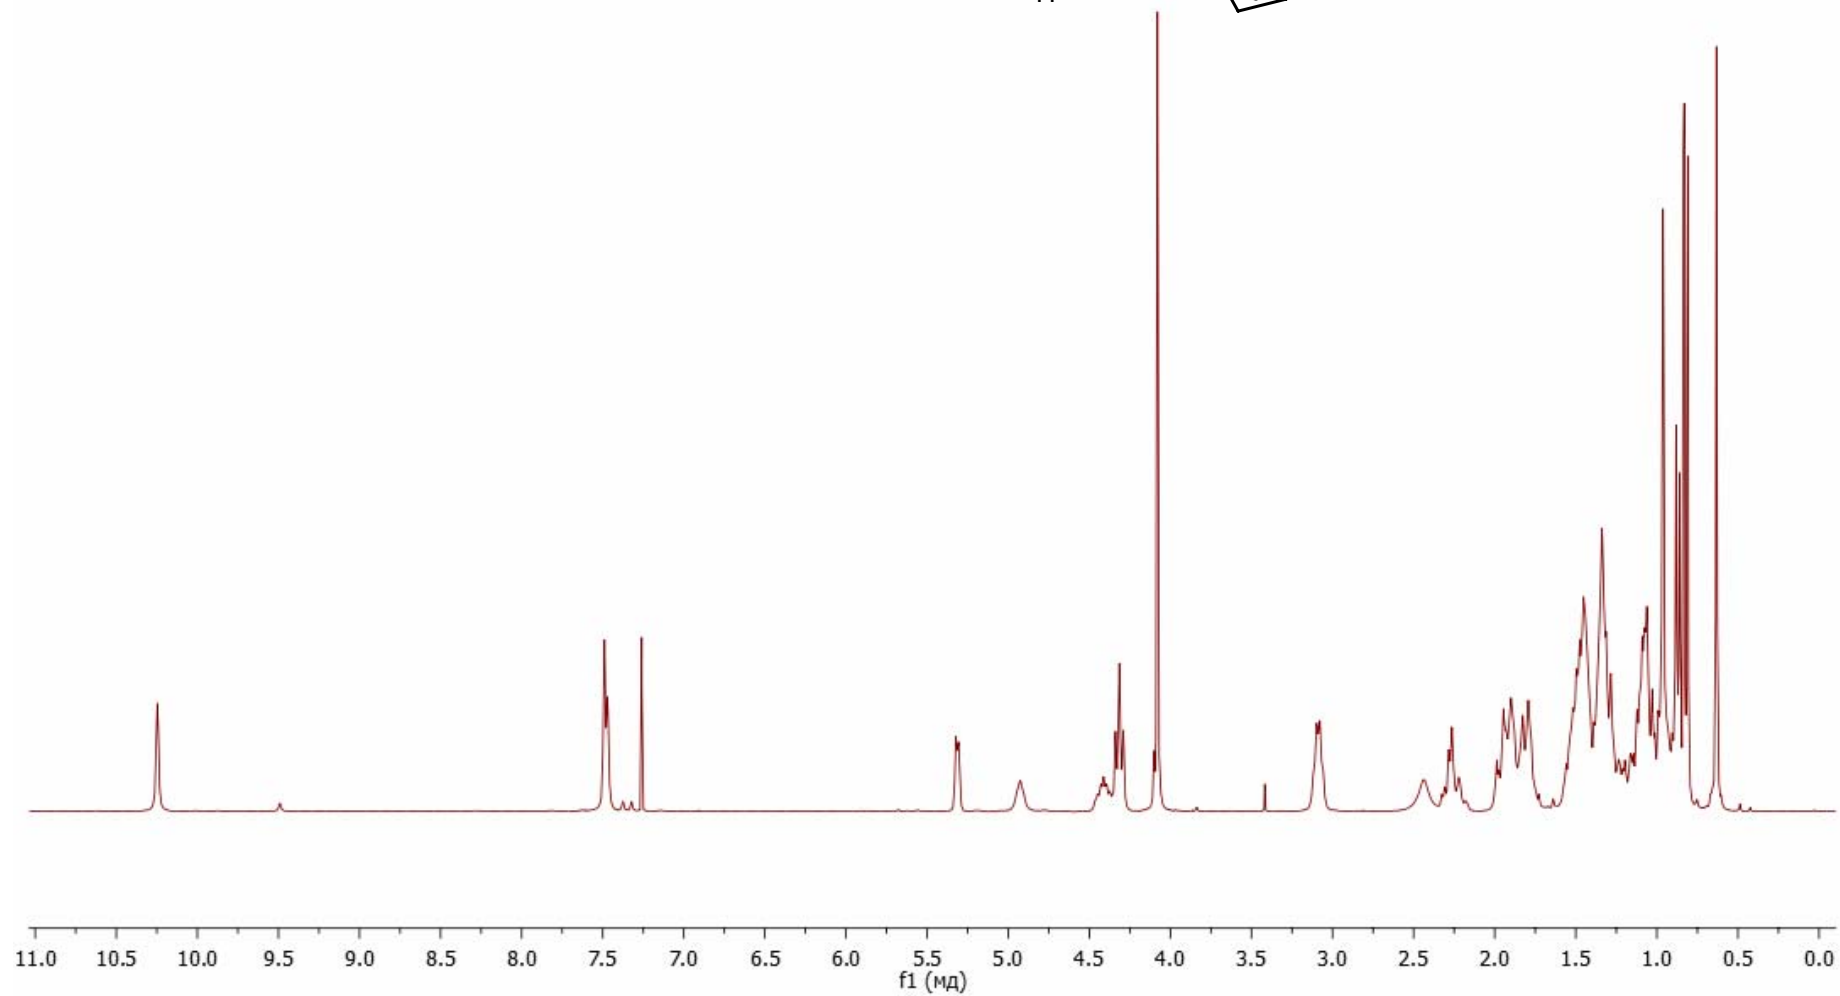

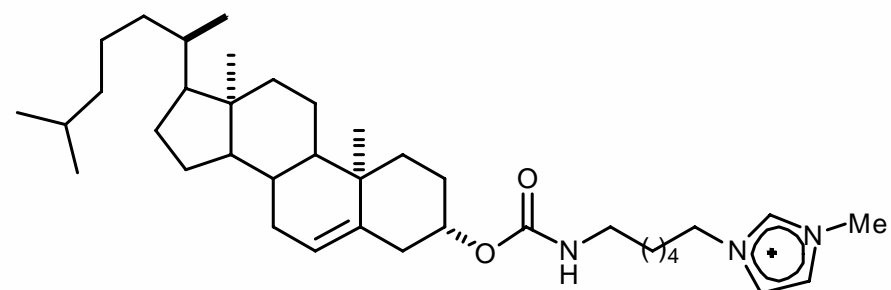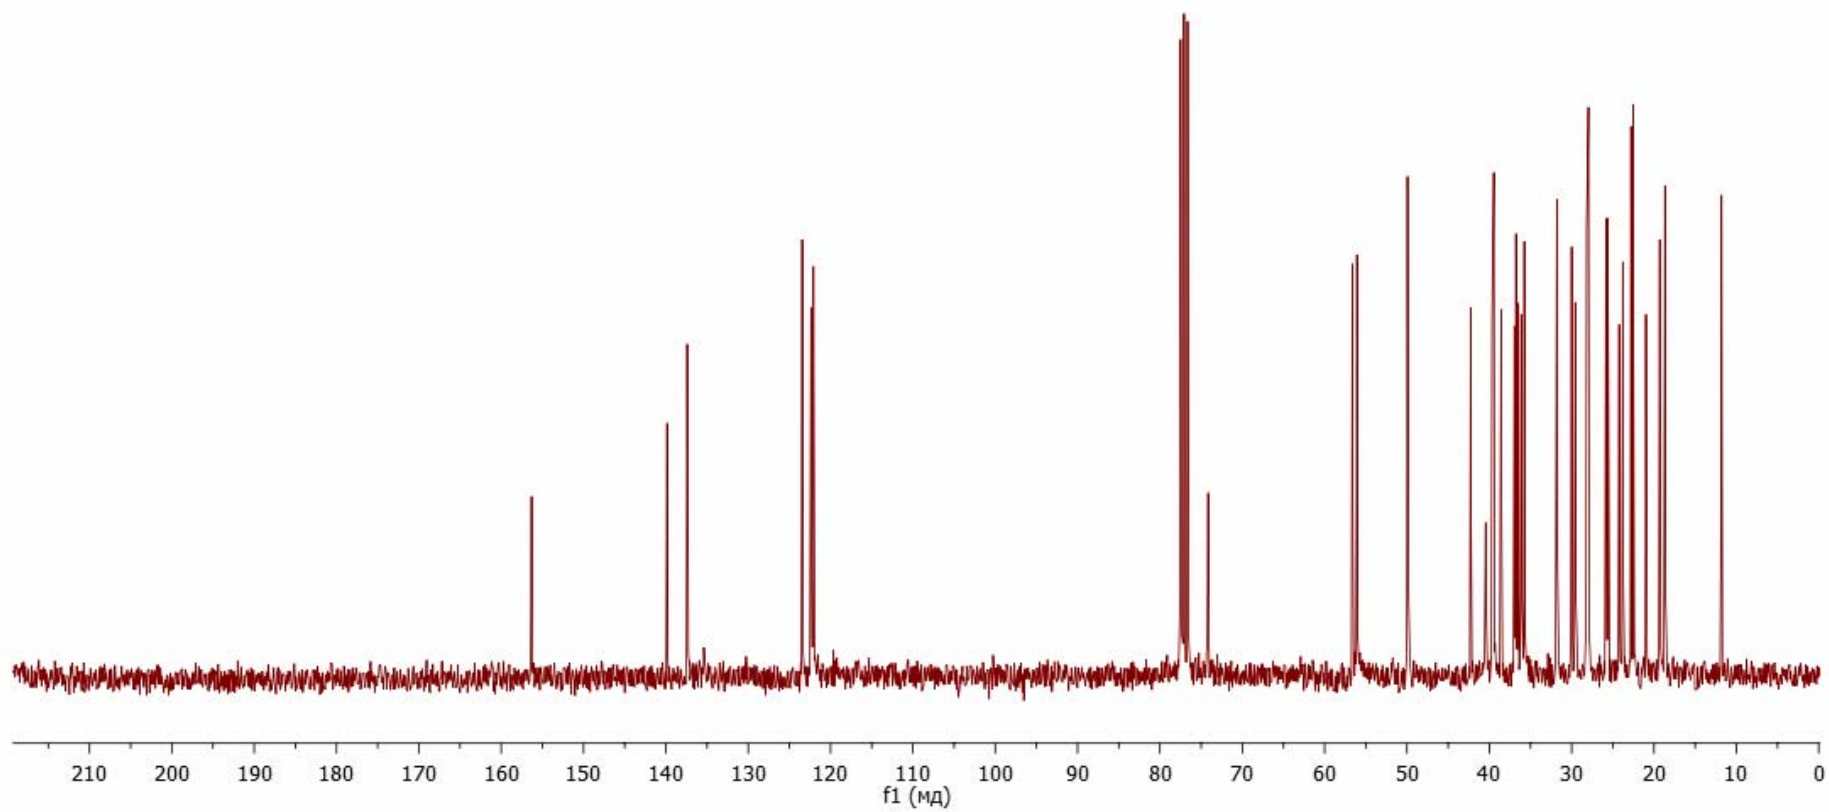



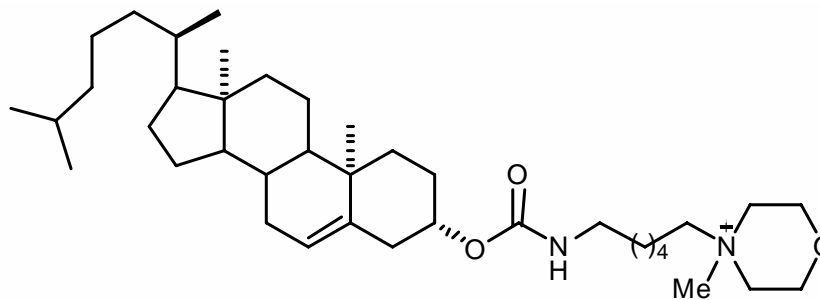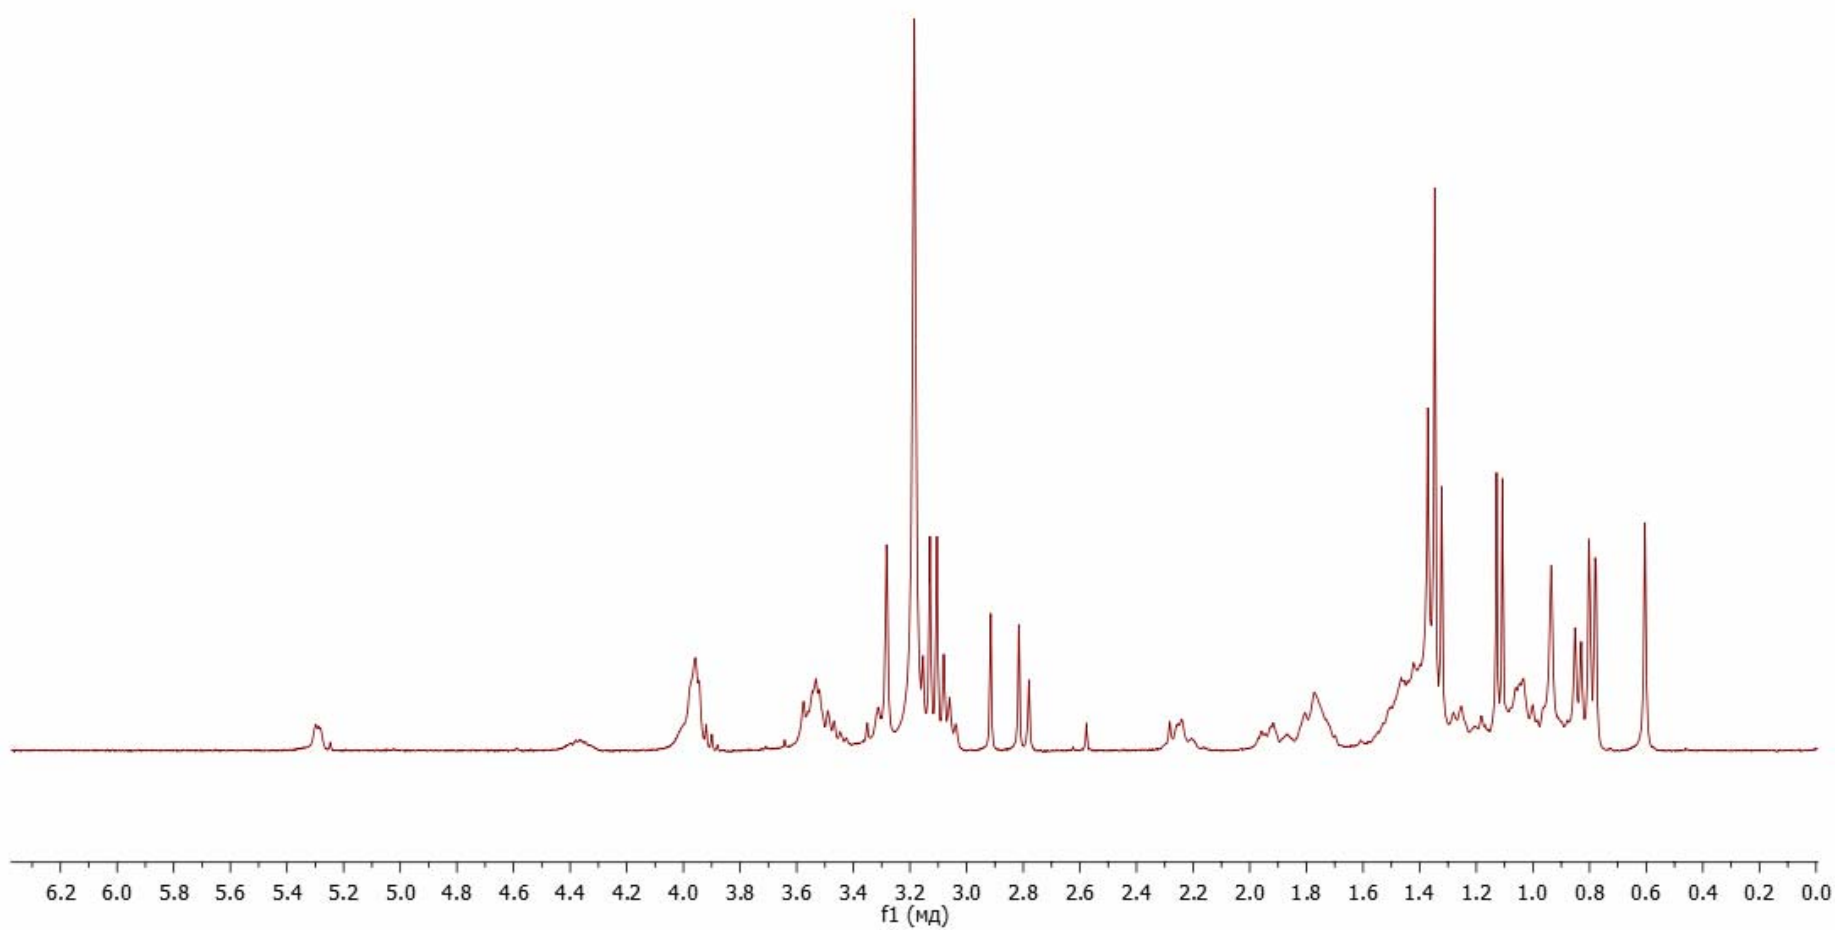

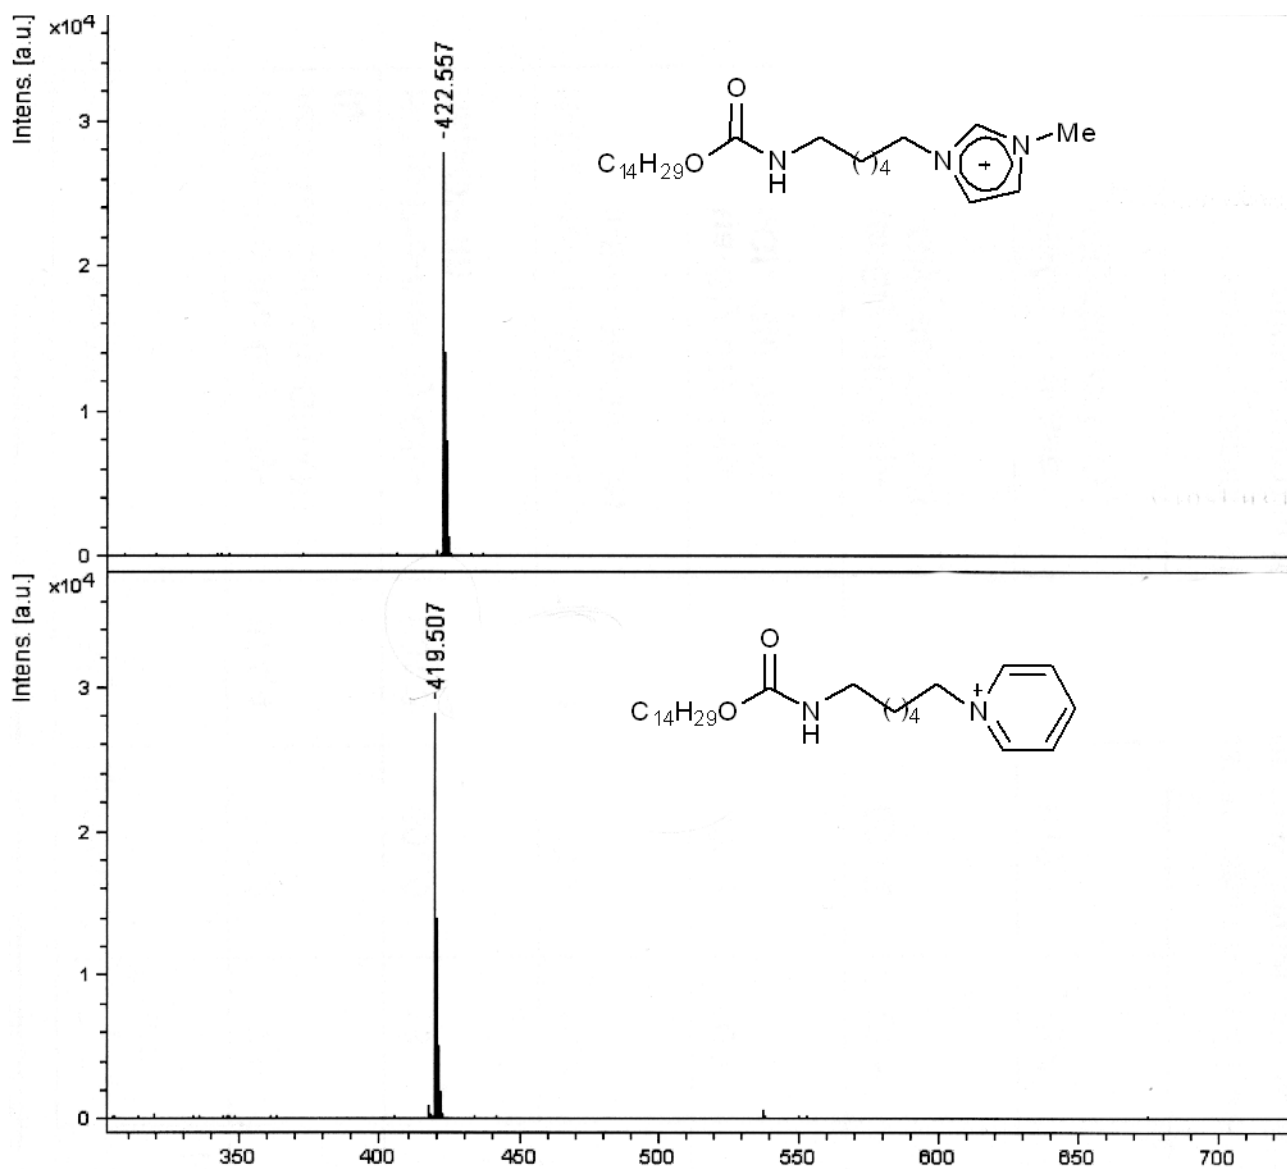

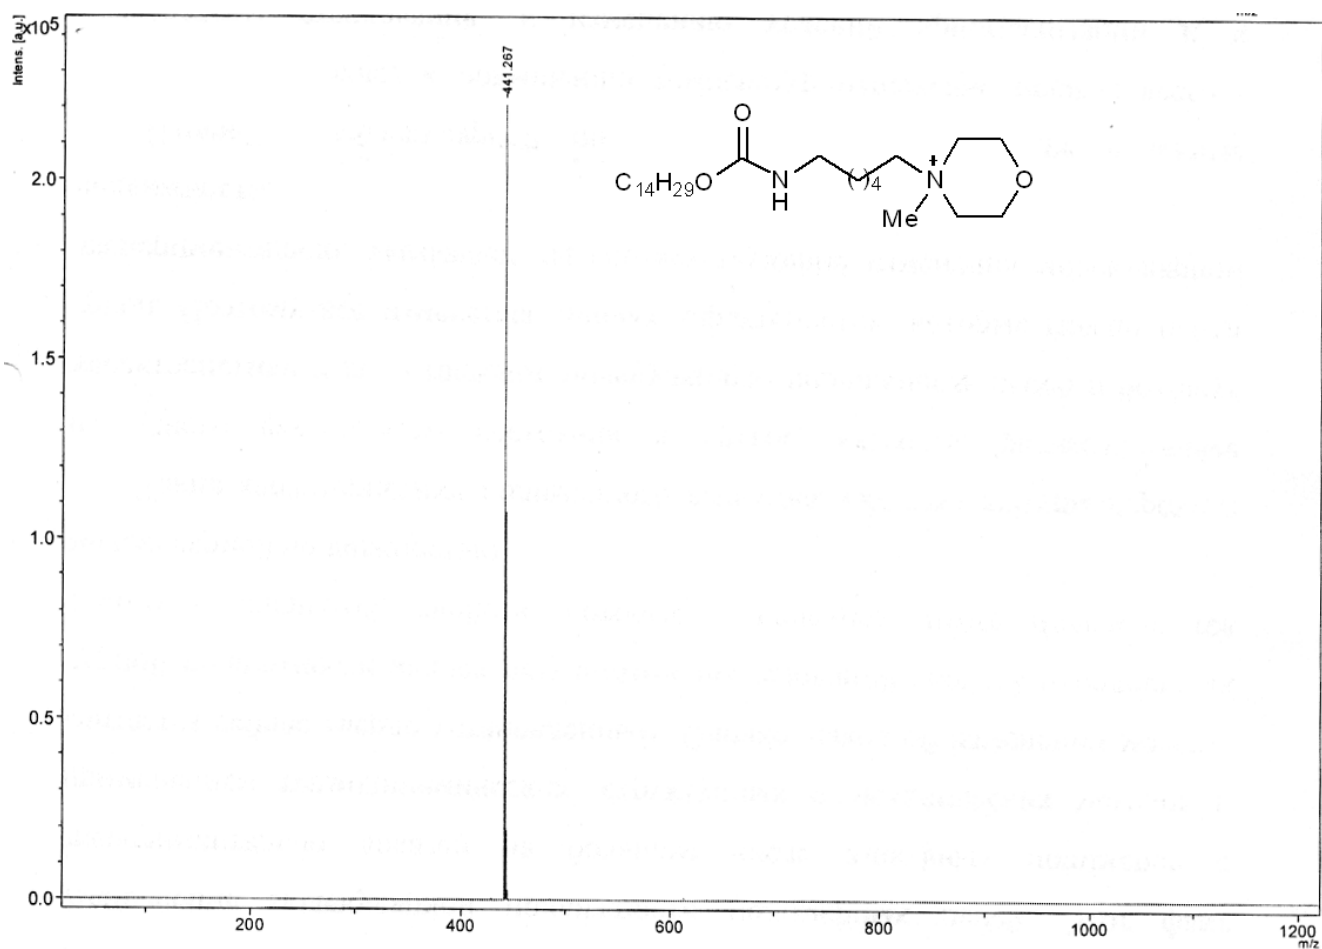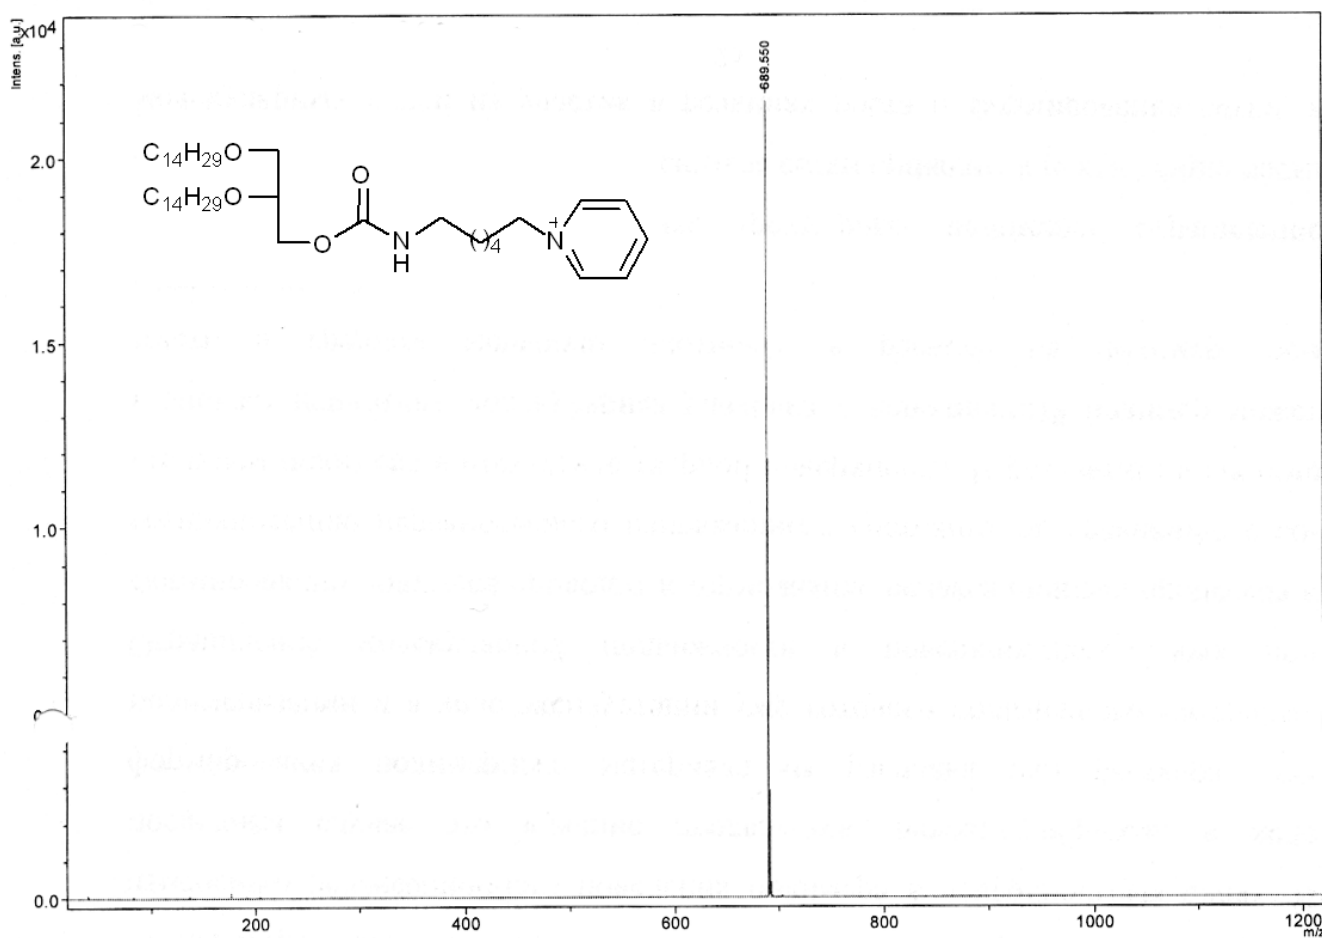

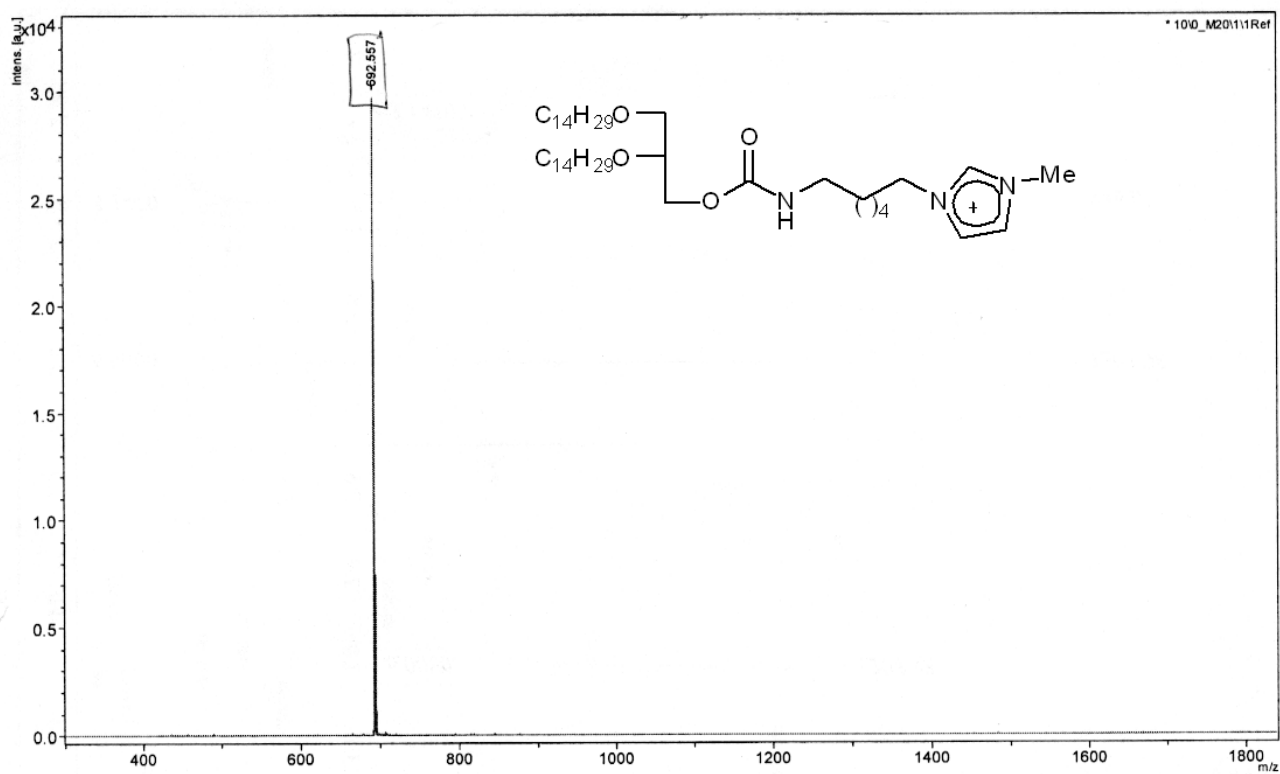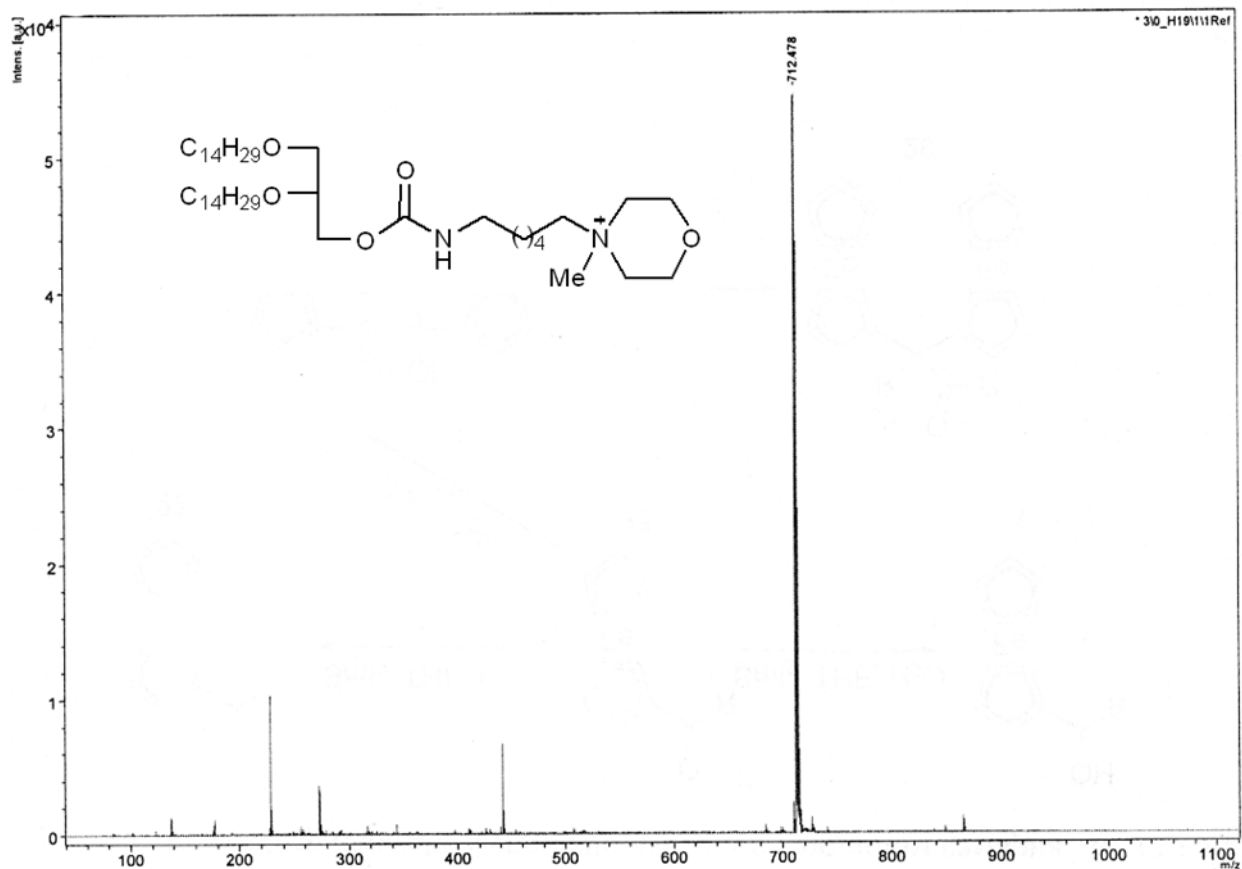

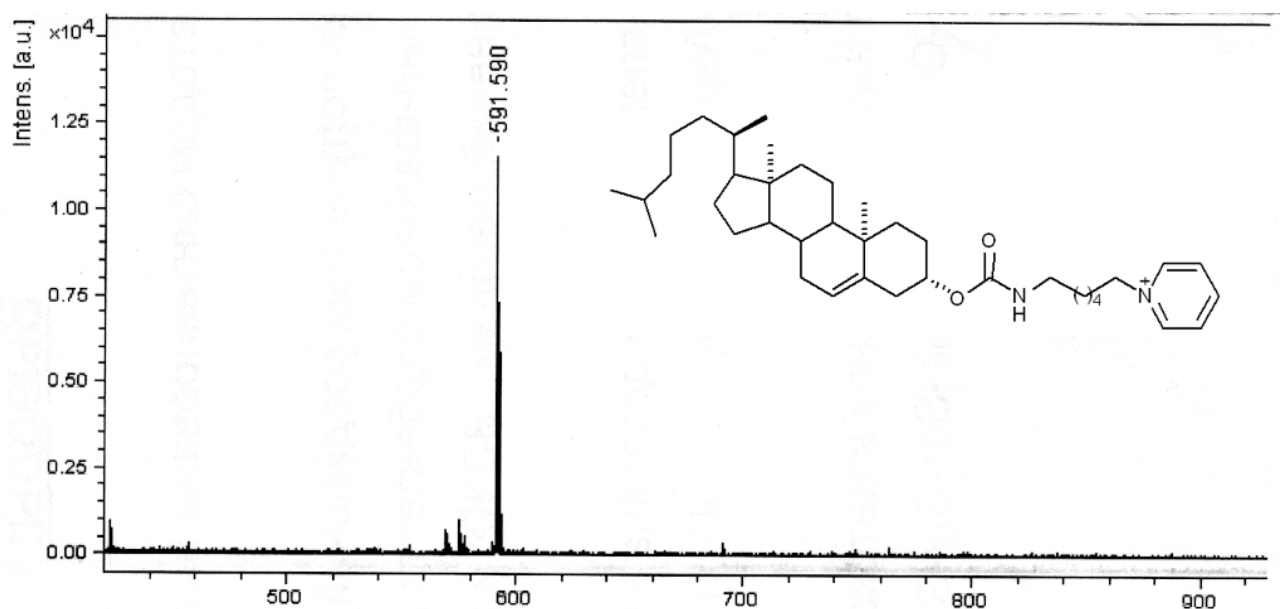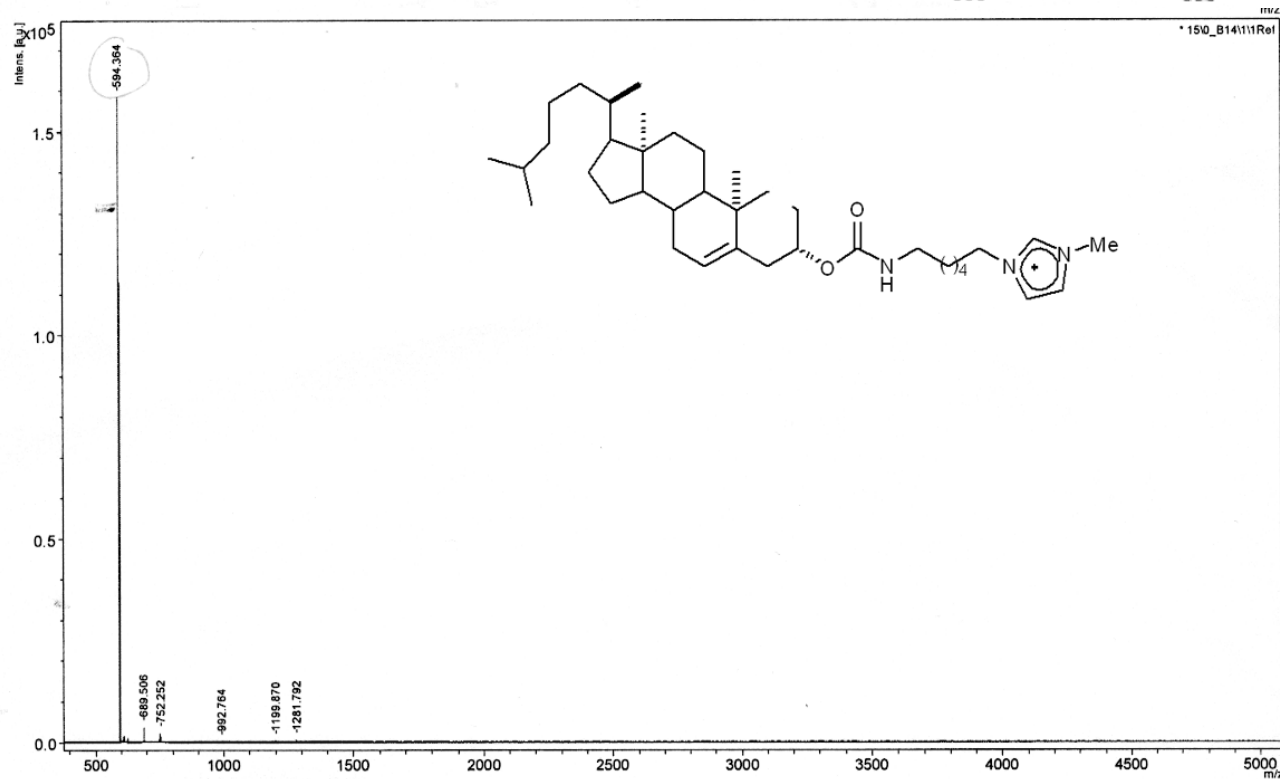

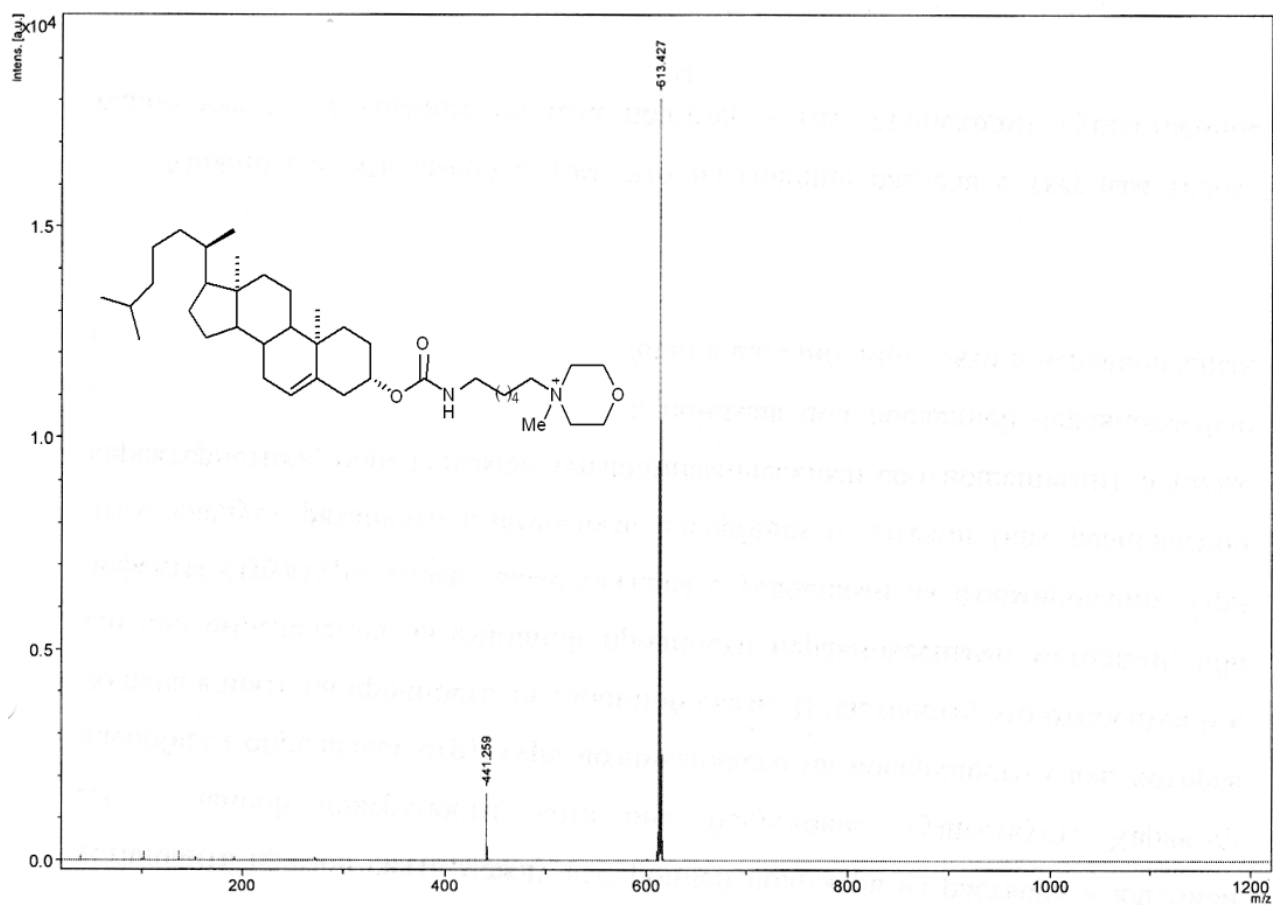

Supplement: c3ob40442k.pdf [file c3ob40442k.pdf]
